# Supplementary material for: Tube Expansion Deformation Enables In Situ Synchrotron X-ray Scattering Measurements during Extensional Flow-Induced Crystallization of Poly l-Lactide Near the Glass Transition
Source: MDPI journal article supplement (doi:10.3390/polym10030288), 2018-03-08

1 Article – Supporting Information

2 **Tube expansion deformation enables *in***  
3 ***situ* synchrotron x-ray scattering measurements**  
4 **during extensional flow-induced crystallization of**  
5 **poly L-lactide near the glass transition**

6

7 **Karthik Ramachandran**<sup>1</sup>, **Riccardo Miscioscia**<sup>2</sup>, **Giovanni De Filippo**<sup>3</sup>, **Giuseppe Pandolfi**<sup>2</sup>,  
8 **Tiziana Di Luccio**<sup>1,2</sup> and **Julia A. Kornfield**<sup>1\*</sup>

9 <sup>1</sup> Division of Chemistry and Chemical Engineering, California Institute of Technology, Pasadena, CA 91125,  
10 USA; [kramacha@caltech.edu](mailto:kramacha@caltech.edu) (K.R.); [tidilu@caltech.edu](mailto:tidilu@caltech.edu) (T.D.L.); [jak@cheme.caltech.edu](mailto:jak@cheme.caltech.edu) (J.A.K)

11 <sup>2</sup> Division of Sustainable Materials, ENEA, Centro Ricerche Portici, 80055 Portici, Italy;  
12 [riccardo.miscioscia@enea.it](mailto:riccardo.miscioscia@enea.it) (R.M.); [giuseppe.pandolfi@enea.it](mailto:giuseppe.pandolfi@enea.it) (G.P.)

13 <sup>3</sup> Division of Photovoltaics and Smart Networks, Innovative Device Unit, Centro Ricerche Portici, 80055  
14 Portici, Italy; [giovanni.defilippo@enea.it](mailto:giovanni.defilippo@enea.it)

15 \* Correspondence: [jak@cheme.caltech.edu](mailto:jak@cheme.caltech.edu); Tel.: +1-626-395-4138

16 Received: 11 February 2018; Accepted: 6 March 2018; Published: date

17

18

19

20

## Supporting Information

## 21 Selection of lamp orientation relative to the preform

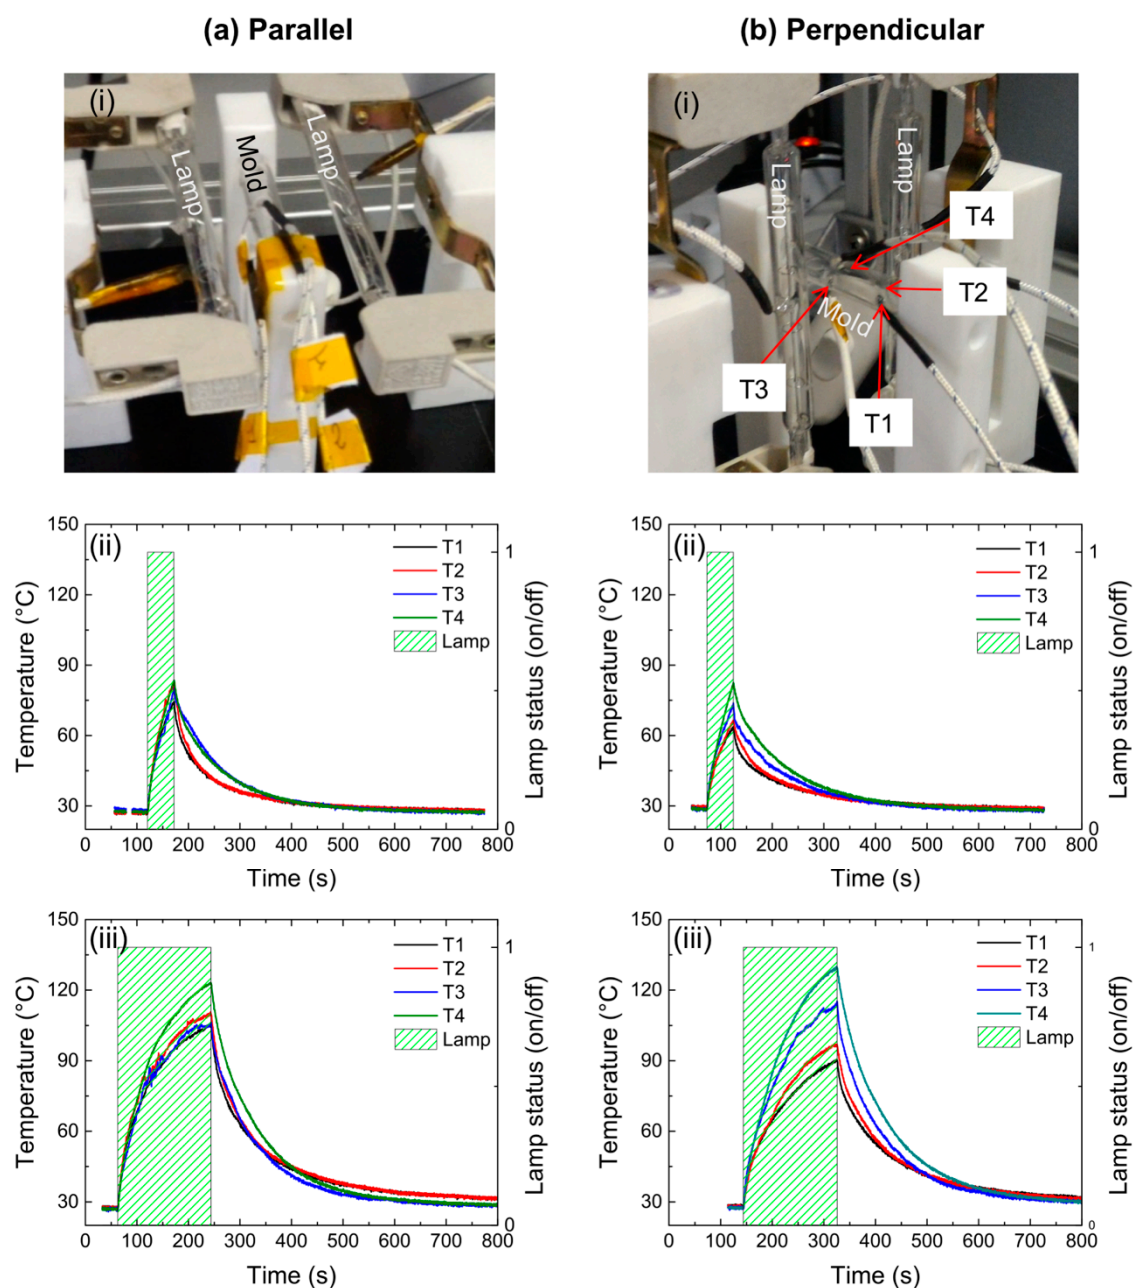

22

23 **Figure S1:** Four thermocouples (T1 to T4) are placed at different positions along a customized Pyrex mold to  
 24 probe azimuthal and axial gradients in temperature induced by the IR lamps oriented **(a)** parallel to the preform  
 25 and **(b)** perpendicular to the preform. T1 and T2 are located ~30mm from the center of the mold while T3 and  
 26 T4 are at the center of the mold. T1 and T3 probe the temperature of the mold surface directly facing the lamps  
 27 while T2 and T4 probe the temperature of the mold surface 90° from T1 and T3. Temperature traces are plotted  
 28 for a lamp exposure time of (a-b, ii) 50s and (a-b, iii) 180s.

29

30 It is desirable to achieve uniform heating of the preform prior to expansion for homogeneous  
 31 deformation and wall thickness. The IR lamps (OD:10mm and length:118mm) can be oriented either  
 32 parallel or perpendicular to the preform. We tested both configurations (Fig. S1a-b,i) using a  
 33 customized Pyrex mold (ID: 8mm, OD:10mm and length: 60mm) with incisions for thermocouples  
 34 made at the center (one facing the lamps and the second 90° away) and 30mm from the center (one  
 facing the lamps and the second 90° away). For an exposure time of 50s, the difference in temperature



35 across all four thermocouples is  $\sim 10^{\circ}\text{C}$  for the parallel configuration but is  $\sim 20^{\circ}\text{C}$  for the perpendicular  
36 configuration (compare Fig.S1a-b, ii); prolonged exposure (180s) increases these gradients to  $\sim 15^{\circ}\text{C}$   
37 for the parallel configuration and  $>30^{\circ}\text{C}$  for the perpendicular configuration (compare Fig. S1a-b, iii).  
38 It is reasonable to expect that the parallel configuration minimizes axial gradients in temperature as  
39 the lamps illuminate a greater portion of the mold surface. Based on these data, we orient the lamps  
40 parallel to the mold for the experiments described in this report.

41

42

43

44

45

46

47

48

49

50

51

52

53

54

55

56

57

58

59

60

61

62

63

64

## 65 Numerical simulations of the energy absorbed by the mold and the preform

66

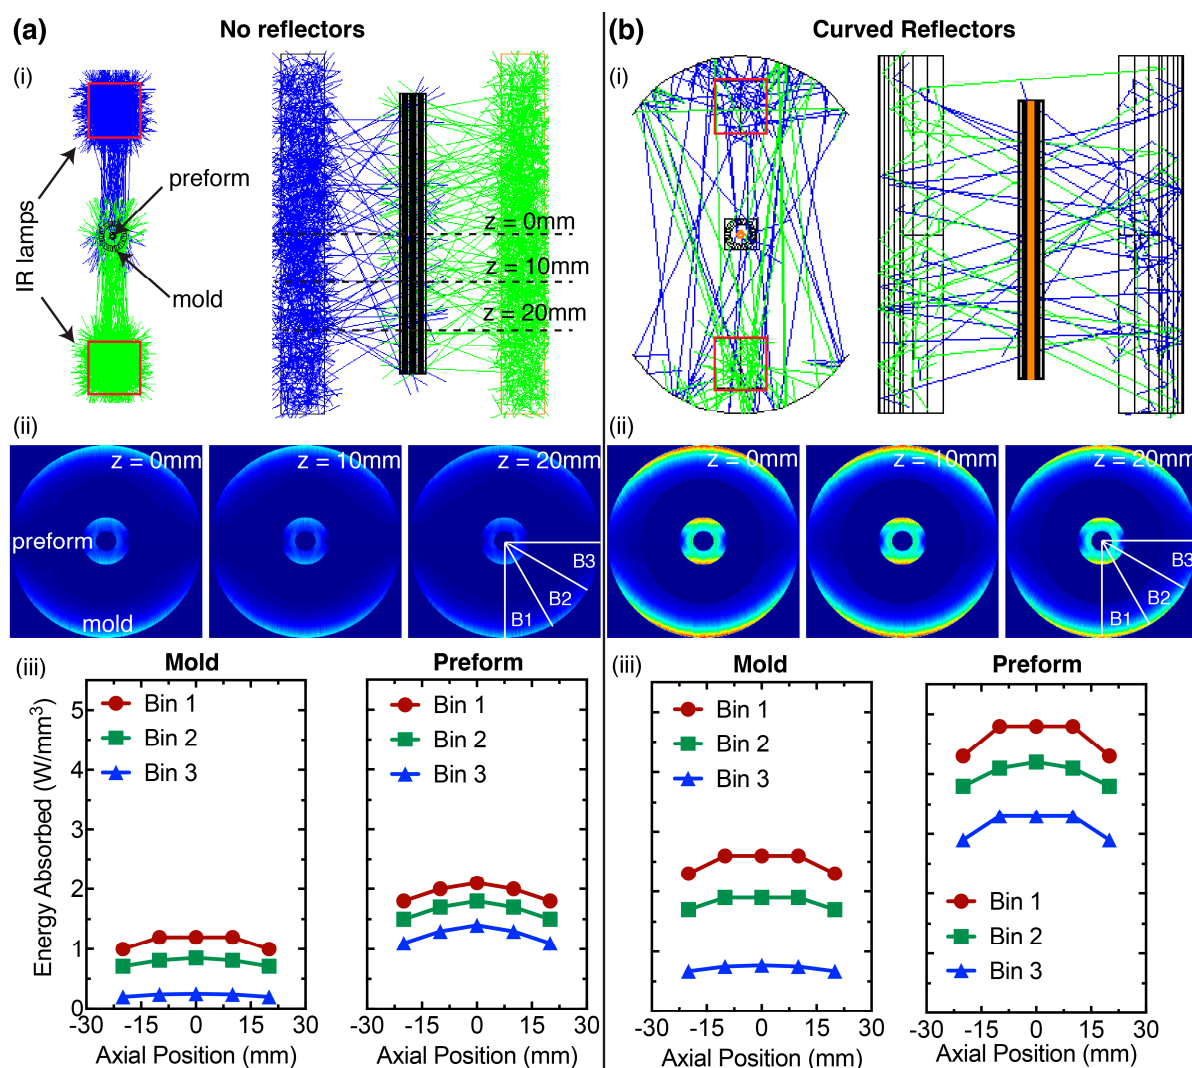

67 **Figure S2:** Ray tracing calculations performed in Zemax estimate the fraction of Infra-red (IR) light absorbed by  
 68 the mold and the preform (a) without reflectors and (b) with curved reflectors. The fraction of energy absorbed  
 69 is presented as (a-b, ii) 2D maps at different positions along the axis of the mold and the preform. The 2D data  
 70 are averaged to calculate (a-b, iii) from the inner to the outer diameter to obtain the azimuthal distribution of  
 71 absorbed energy (bin size is  $30^\circ$ ) for the mold (left, a-b, iii) and the preform (right, a-b, iii); Bin 1 is facing the  
 72 lamps and Bin 3 is  $90^\circ$  from the plane containing the lamps.

73 The two 500W IR lamps have an operating temperature of 2900K; Planck's law is used to estimate  
 74 the fraction of light absorbed by Pyrex (the mold) and poly L-lactide (PLLA, the preform) in accord  
 75 with their IR absorption spectra [1]. Pyrex is mostly transparent to IR radiation between 1 to  $2.7\mu\text{m}$   
 76 (Table S1), a region where PLLA strongly absorbs IR radiation (particularly between  $2.2$  to  $2.7\mu\text{m}$ ,  
 77 Table S1). Beyond  $3\mu\text{m}$ , Pyrex absorbs most of the IR radiation and hardly any light passes through  
 78 (Table S1). We estimate that for a 1mm thickness, the mold and the preform absorb  $\sim 15\%$  and  $\sim 14\%$   
 79 of incident IR radiation respectively (Table S1).

80 The fraction of energy absorbed by Pyrex and PLLA guide the setup of ray tracing simulations  
 81 in Zemax to determine the distribution of energy in the preform and the mold (Fig. S2). The preform  
 82 (ID:  $0.64\text{mm}$ , OD:  $1.52\text{mm}$ , length:  $60\text{mm}$ ) is placed inside the mold (ID:  $3.9\text{mm}$ , OD:  $6.0\text{mm}$ , length:  
 83  $60\text{mm}$ ) and the two IR lamps (OD:  $10\text{mm}$ , total length:  $118\text{mm}$ , filament length:  $82\text{mm}$ ) are positioned  
 84  $25\text{mm}$  on either side of the preform (Fig. S2, i) in the parallel configuration (described in Figure S1).

85 As the two 500W IR lamps are operated at 48V, they are assigned an effective power of ~100W in  
 86 Zemax (of this, it is assumed that the mold can absorb a maximum of 15W and the preform can absorb  
 87 a maximum of 14W). Ray tracing calculations are performed with and without curved reflectors (arc  
 88 length: 42mm, axial length: 82mm, radius: 25mm), placed 10mm from the OD of the lamps, to note  
 89 their impact on the absorbed radiation (Fig. S2, i).

90 **Table S1:** Fraction of incident IR radiation absorbed by the Pyrex mold and the PLLA preform

| Wavelengths               | Fraction of Total Energy | Fraction absorbed by Pyrex mold | Fraction absorbed by PLLA preform |
|---------------------------|--------------------------|---------------------------------|-----------------------------------|
| 0 $\mu$ m - 1.5 $\mu$ m   | 48%                      | <5%                             | <5%                               |
| 1.5 $\mu$ m - 2.2 $\mu$ m | 24%                      | <5%                             | 20%                               |
| 2.2 $\mu$ m - 2.7 $\mu$ m | 10%                      | <5%                             | 95%                               |
| 2.7 $\mu$ m - 3 $\mu$ m   | 4%                       | 50%                             | ~0%                               |
| 3 $\mu$ m - 3.5 $\mu$ m   | 3.5%                     | 54%                             | ~0%                               |
| 3.5 $\mu$ m - 4 $\mu$ m   | 2.5%                     | 75%                             | ~0%                               |
| >4 $\mu$ m                | 10.5%                    | >90%                            | ~0%                               |

91 The simulations provide insight on the distribution of energy with and without reflectors along  
 92 the axial and azimuthal directions of the mold/preform. The reflectors induce a 200% increase in the  
 93 energy absorbed by the PLLA preform (compare a-b, Fig. S2).; the heat flux in Bin 1 (B1), a volume  
 94 element directly facing lamps, increases from ~2.1 mW/mm<sup>3</sup> to ~4.8 mW/mm<sup>3</sup> (compare absorbed  
 95 flux for preform in Fig. S2a-b, ii-iii). An increase in the absorbed IR radiation translates to a faster  
 96 heating of the preform, which is desirable to minimize quiescent crystallization prior to expansion.  
 97 The simulations indicate minimal gradients in the absorbed energy along the z-axis (~10% from the  
 98 center to the edge, Fig. S2, ii-iii) but suggest substantial gradients along the azimuthal direction (>30%,  
 99 for both the mold and the preform from Bin 1 to Bin 3, which is facing away from the lamps; Fig. S2,  
 100 iii).

101 The heat flux data from Zemax are used in the finite-element software Abaqus to estimate the  
 102 rate and distribution of temperature in the mold ( $\rho = 2.2 \text{ g/cm}^3$ ,  $k = 1 \text{ W/m-K}$ ,  $C_p = 750 \text{ J/kg-}^\circ\text{C}$  [2])  
 103 and the preform ( $\rho = 1.3 \text{ g/cm}^3$  [3],  $k = 0.13 \text{ W/m-K}$  [4],  $C_p = 1800 \text{ J/kg-}^\circ\text{C}$  [5]). Abaqus predicts that  
 104 the PLLA preform heats up faster than the mold: after 50s of heating, the mold reaches a temperature  
 105 of ~90 $^\circ\text{C}$  (rate: ~1.1 $^\circ\text{C/s}$ , Fig. S3) while the preform reaches a temperature of ~125 $^\circ\text{C}$  (~1.75 $^\circ\text{C/s}$ , Fig.  
 106 S3). Furthermore, the azimuthal gradients for both the mold and the preform are minimal (<3 $^\circ\text{C}$ , Fig.  
 107 S3), suggesting that there are no "hot spots" in the preform that can lead to non-uniform expansion.  
 108 The faster heating rate of the preform is in agreement with experimental data (Fig. S4). The  
 109 instrument was modified to probe the temperature of the mold, a PLLA preform inside the mold,  
 110 and a PLLA preform outside the mold during the heating and annealing steps (Fig. S4a); for a set  
 111 mold temperature of 85 $^\circ\text{C}$ , the PLLA preform inside the mold is ~20 $^\circ\text{C}$  warmer at the onset of  
 112 annealing (Fig. S4b). Furthermore, the PLLA preform temperature does not increase during the  
 113 annealing step (Fig. S4b), indicating that the rapid increase in strain beyond the inflection point (Fig.  
 114 4a,b,ii) is not influenced by an increase in temperature.

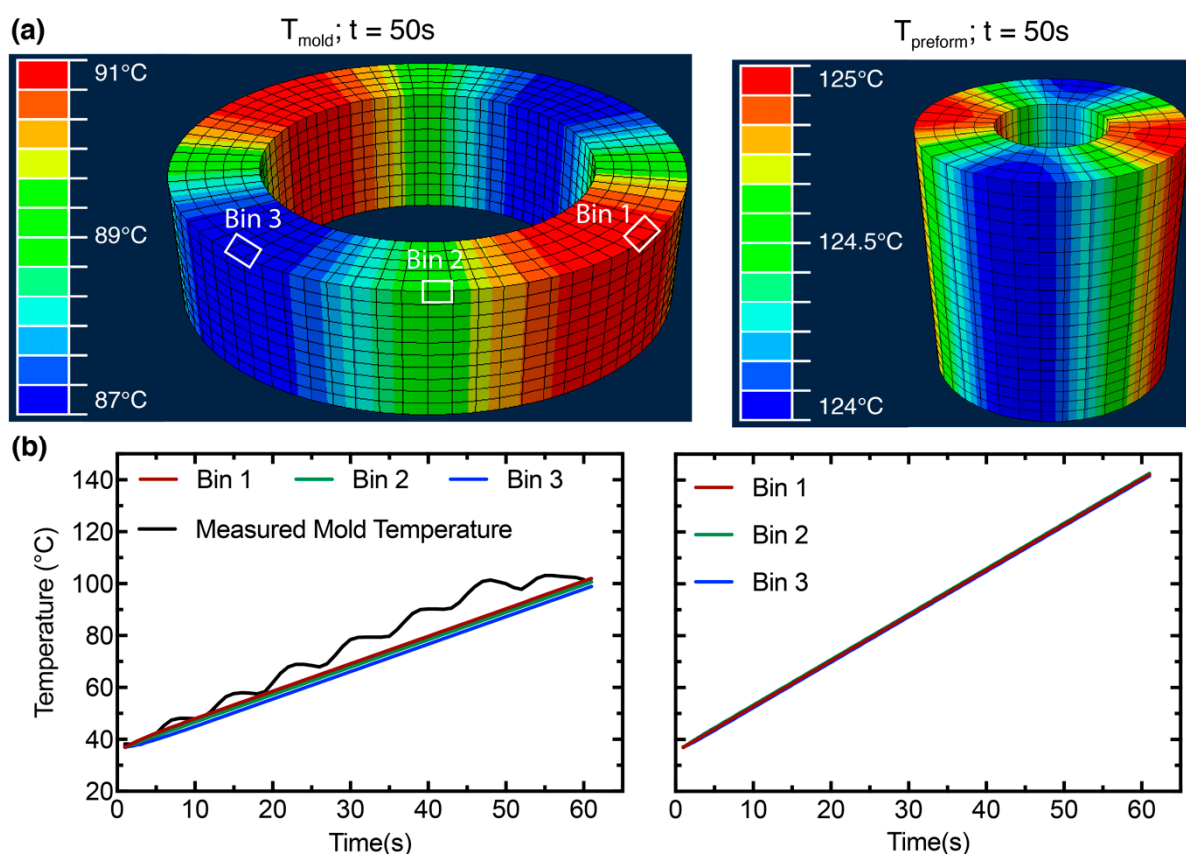

115

116 **Figure S3:** (a) 2D heat map generated by Abaqus illustrating the azimuthal gradients in temperature for the  
 117 mold (left) and the preform (right) during heating for 50s. (b) 1D plots for bins located 0, 45 and 90° from the  
 118 plane containing the lamps (location of bins defined in a, left) for the mold (left) and the preform (right). The  
 119 predicted temperature of the mold (bins 1-3 in b, left) is compared with experimental data acquired on the  
 120 surface of the mold (black line in b, left).

121

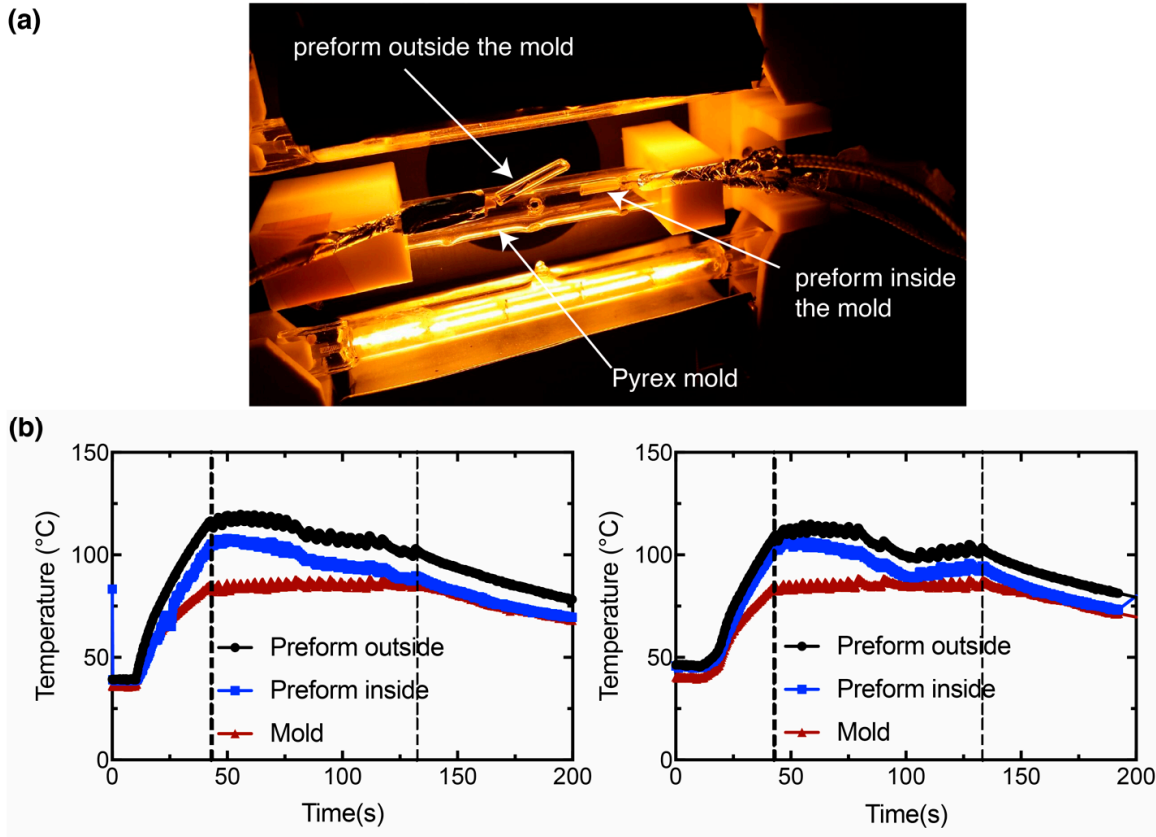

122

123

124

125

126

127

128

129

130

**Figure S4:** The instrument is modified to simultaneously probe the temperature of the mold in relation to a PLLA preform both inside and outside the mold. (a) image highlighting the position of the preforms with respect to the mold. (b) Temperature traces for the preforms and the mold are presented for two consecutive cycles of heating and cooling (b, left and right). The first dashed vertical line indicates the onset of annealing (at a set mold temperature of 85°C) and the second dashed vertical line indicates the end of annealing and the onset of cooling.



131 **Implementation of the instrument at the X-ray beamline**

132

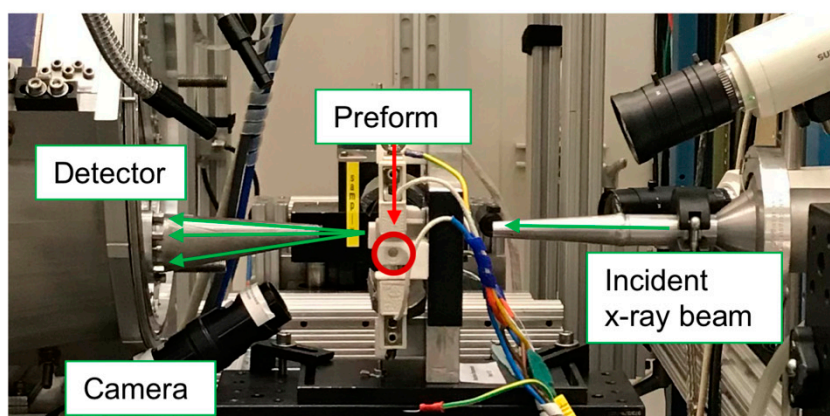

133

134 **Figure S5:** Position of the instrument with respect to the incident X-ray beam, the detectors (only WAXS detector  
135 is visible here) and the camera used to monitor inflation. The preform, molds and IR lamps are placed with their  
136 z-axis normal to the plane of the image.

137 The instrument is mounted on an optical bench at the beamline that can be translated in the  
138 horizontal direction (in and out of this plane) and the vertical direction (up and down in this plane)  
139 for sample alignment. The instrument is placed between two nose cones (identified by green arrows,  
140 Fig. S5) that are 70mm apart. Incident X-rays travel from the right nose cone and scattered X-rays are  
141 probed by detectors towards the left (Fig. S5). It is critical to avoid contact with the nose cones when  
142 the instrument is mounted/dismounted from the beamline. The instrument was designed with these  
143 spatial constraints in mind to have a minimal footprint at the synchrotron beamline.

144

## 145 X-ray scattering analysis

146 Poly L-lactide (PLLA) performs are expanded inside Pyrex molds with simultaneous acquisition  
 147 of wide (WAXS) and small angle X-ray scattering (SAXS) data. The thickness of PLLA in the beam  
 148 varies from  $\sim 400\mu\text{m}$  (preform) to  $\sim 140\mu\text{m}$  (expanded tube), which is less than half that of the Pyrex  
 149 mold ( $\sim 1\text{mm}$ ). As a result, relatively strong scattering from the mold obscures WAXS features of the  
 150 expanded tube, particularly in the vicinity of  $q \sim 1.5 \text{ \AA}^{-1}$  (Fig. S6). Diffraction patterns acquired on the  
 151 mold alone indicate a  $\sim 15\%$  variation in the scattered intensity ( $\sim 300$  counts, Fig. S7), which is  $\sim 50\%$   
 152 of the scattering from PLLA alone ( $\sim 700$  counts, Figs. 5-6 and Figs. S11-S14). Therefore, direct  
 153 subtraction of the Pyrex background from PLLA+Pyrex frames results in under or over-subtraction.  
 154 The variation in scattered intensity of the mold can be attributed to a shift in the position of the mold  
 155 with respect to the beam from one experiment to the other; this subtle variation in the thickness of  
 156 the mold gives rise to discrepancies during subtraction. To overcome this complication, we take an  
 157 average in 2D of 30 Pyrex patterns acquired immediately before and after tube expansion  
 158 experiments over a period of 7 hours; this average background frame is then rescaled using the  
 159 method described below and subsequently subtracted from PLLA+Pyrex frames to minimize  
 160 subtraction errors.

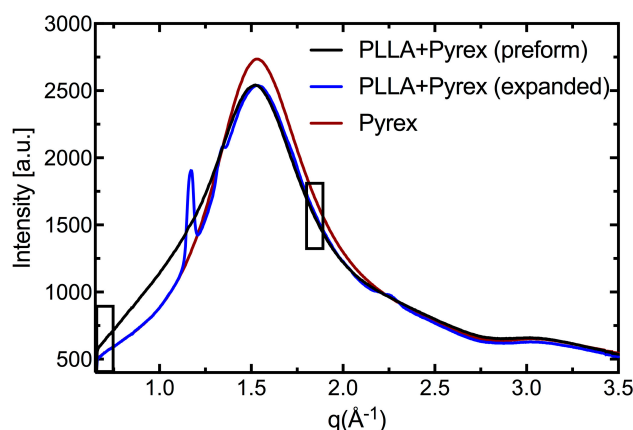

161

162 **Figure S6:** Comparison between 1D WAXS profiles for PLLA+Pyrex (before and after expansion) and the Pyrex  
 163 mold.

164 We rescale the background by identifying  $q$ -intervals for the PLLA preform that are mostly  
 165 unchanged before and after expansion. The prior literature informs us that scattering from PLLA is  
 166 negligible at a low- $q$  interval of  $0.5\text{-}0.6 \text{ \AA}^{-1}$ . However, we do not have access to scattering below  $0.68$   
 167  $\text{ \AA}^{-1}$  at this beamline due to the size of the beamstop. Therefore, the lowest possible  $q$ -interval available  
 168 to us is  $0.68$  to  $0.75 \text{ \AA}^{-1}$  (indicated by a black box in Fig. S6); the intensity in this  $q$ -interval changes  
 169 during inflation ( $t < 100\text{s}$ , Fig. S8a) but hardly varies post expansion ( $t > 100\text{s}$ , Fig. S8a). At high- $q$ , we  
 170 use an interval spanning  $1.80$  to  $1.90 \text{ \AA}^{-1}$  (indicated by a black box in Fig. S6) as the intensity in this  
 171 region varies by  $\sim 3\%$  before and after inflation (Fig. S8b). Therefore, we use the average intensity in  
 172 these low- $q$  ( $0.68$  to  $0.75 \text{ \AA}^{-1}$ ) and high- $q$  ( $1.80$  to  $1.90 \text{ \AA}^{-1}$ ) intervals to two define two parameters ( $\alpha$   
 173 and  $\beta$ ) to rescale the average Pyrex background with respect each PLLA+Pyrex frame. The parameter  
 174  $\alpha$  relates the difference in intensity ( $\Delta I$ ) between the low- $q$  ( $I_L$ ) and high- $q$  ( $I_H$ ) intervals for the  
 175 PLLA+Pyrex frame to that of the average Pyrex frame. The parameter  $\beta$  applies an offset to the  
 176 average Pyrex background to match the  $I_H$  of the PLLA+Pyrex frame. Using  $q$  for the radial  
 177 wavevector and  $\varphi$  for the azimuthal angle, we arrive at the following equations to isolate the  
 178 scattering of PLLA ( $S_{\text{subtracted}}$ ) from PLLA+Pyrex ( $S$ ) by subtracting the average Pyrex frame ( $B$ ):

179

$$S(\mathbf{q}, \varphi)_{\text{subtracted}} = S(\mathbf{q}, \varphi) - \alpha \cdot B(\mathbf{q}, \varphi) - \beta \quad [S1]$$

$$\alpha = \frac{I_L^S - I_H^S}{I_L^B - I_H^B} \quad [S2]$$

$$\beta = I_H^S - \alpha I_H^B \quad [S3]$$

The two-parameter subtraction method is applied in 2D to rescale the background, which is subsequently subtracted pixel by pixel from the frame of interest. To test our approach, the rescaled background is subtracted from each of the Pyrex frames in Figure S7 and the resulting residuals (Fig. S9) are analyzed in relation to the scattered intensity from PLLA alone. The impact of rescaling on the averaged background is illustrated in Figure S10; the shape of the rescaled background (dashed golden line, Fig. S10) mimics that of each Pyrex frame (black line, Fig. S10). As a result, the resulting error in subtraction ( $\sim 20$  counts, Fig. S9) is  $< 3\%$  of the scattered intensity from expanded PLLA ( $\sim 700$  counts, Figs. 5-6 and Figs. S11-S14). We acknowledge that this method introduces errors in subtraction at low- $q$  ( $0.68$  to  $0.75 \text{ \AA}^{-1}$ ) for PLLA frames prior to expansion, but these errors do not affect our interpretation of the data.

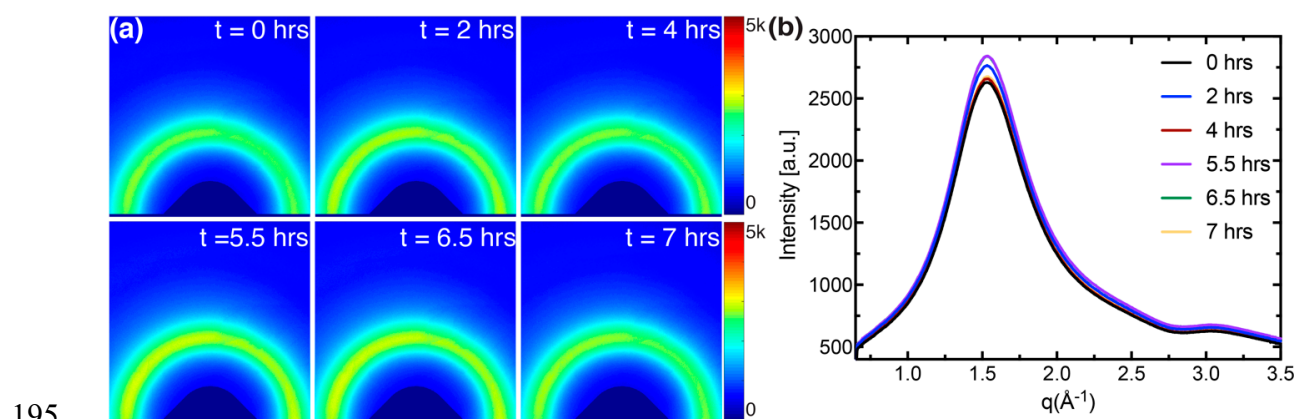

195  
196 **Figure S7:** Variation in scattering from the Pyrex mold over a period of 7 hours during tube expansion  
197 experiments. The WAXS data are presented as (a) 2D patterns and (b) azimuthally averaged,  $I(q)$ , 1D plots.

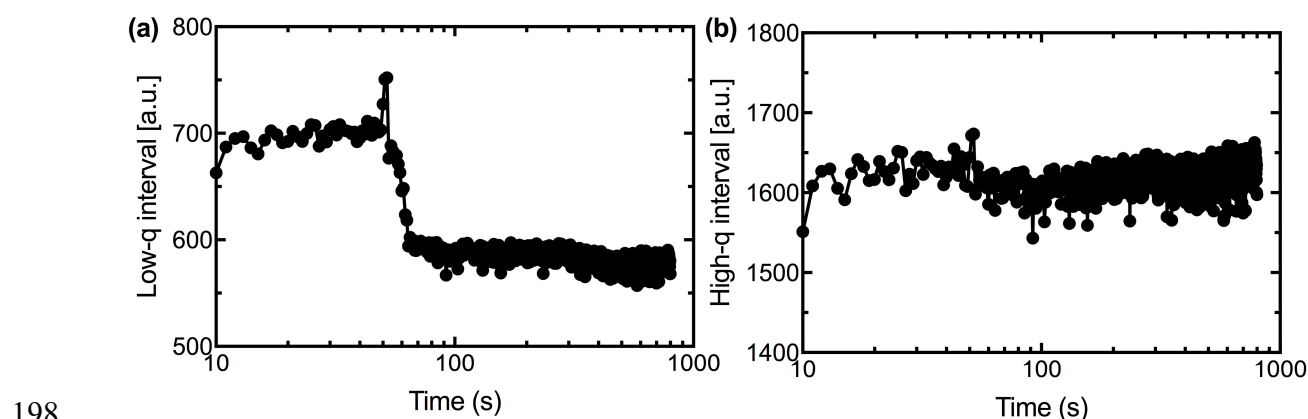

198  
199 **Figure S8:** Drift in the average intensity at (a) low- $q$  ( $0.68$  to  $0.75 \text{ \AA}^{-1}$ ) and (b) high- $q$  ( $1.80$  to  $1.90 \text{ \AA}^{-1}$ ) for  $T^{\text{e mold}} =$   
200  $80^\circ\text{C}$  (Fig. S10) during tube expansion. The sudden decrease in the low- $q$  intensity at  $\sim 50$ s corresponds with  
201 inflation of the PLLA preform (the decrease in thickness of the tube and the transformation of amorphous content  
202 to crystallites is responsible for the drop in amorphous content at low- $q$ ).

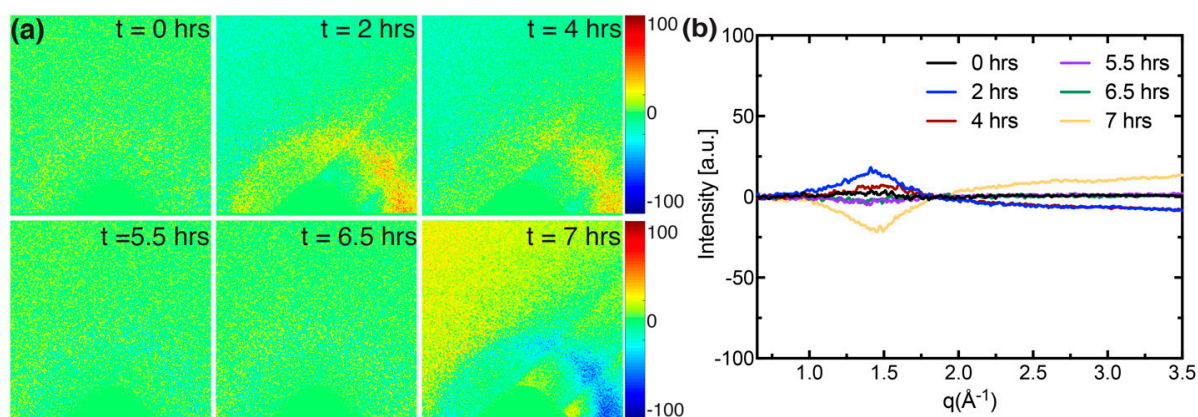

203

204

205

206

**Figure S9:** The error is subtraction is minimal when the average Pyrex background is rescaled using the two-parameter method and subtracted from each of the Pyrex frames (see Fig. S2). The residuals are presented as (a) 2D patterns and (b) azimuthally averaged,  $I(q)$ , 1D plots.

207

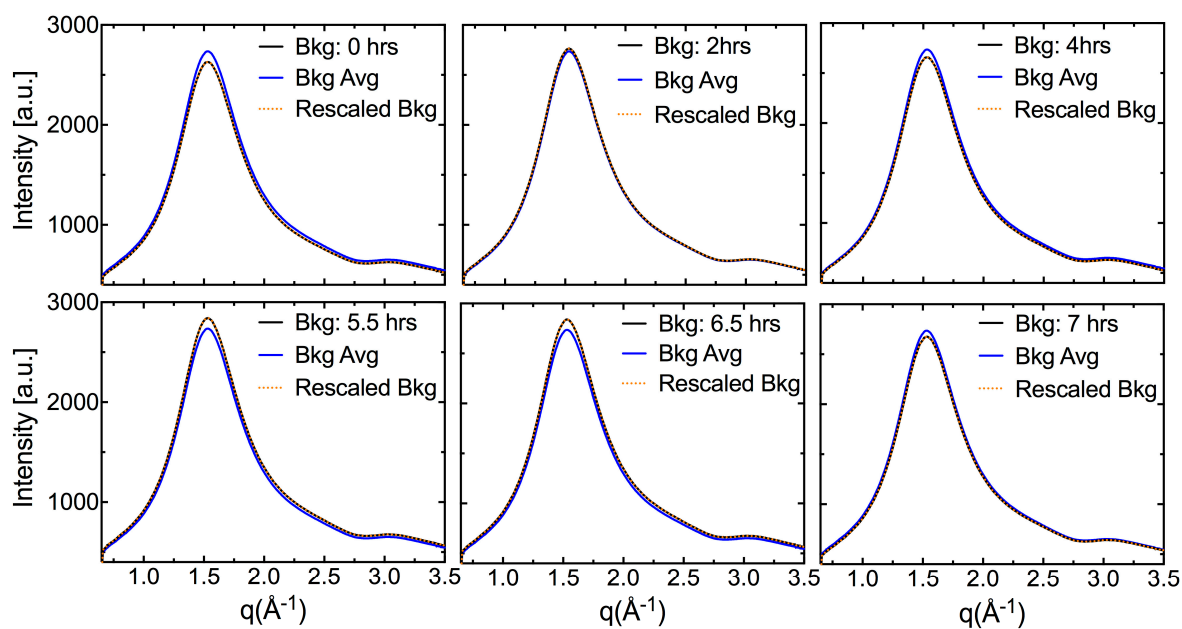

208

209

210

**Figure S10:** 1D WAXS profiles indicate how the average Pyrex background (blue) is rescaled (dashed golden line) to mimic each of the individual Pyrex frames.

211

212

213

214

215

216

217

218



219 Summary of *in situ* WAXS and SAXS data for  $T^{\text{e}}_{\text{mold}} = 80^{\circ}\text{C}$  during the heating and annealing steps

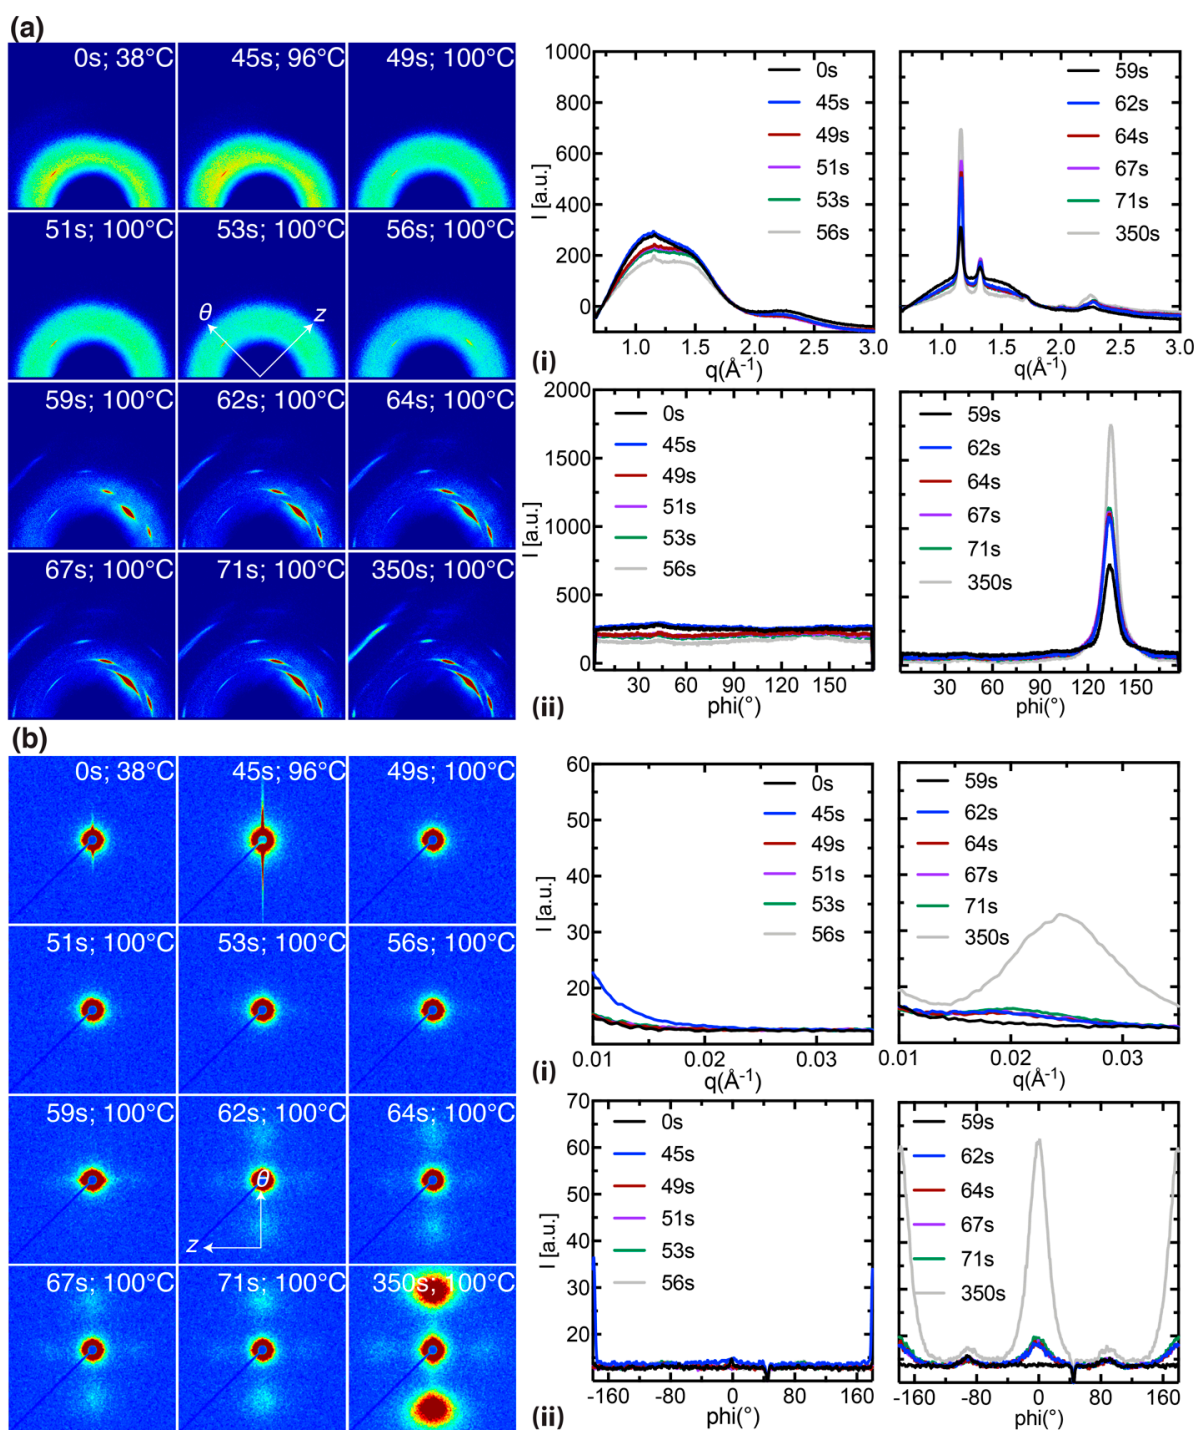

220

221 **Figure S11:** *In situ* (a) WAXS and (b) SAXS data acquired on a PLLA preform stretched at  $T^{\text{e}}_{\text{mold}} = 80^{\circ}\text{C}$ . The  
 222 corresponding temperature and strain profiles are presented in Figs. 3-4a. The WAXS and SAXS data are  
 223 presented as (a-b, left) 2D patterns, (a-b, i) azimuthally averaged intensity,  $I(q)$ , and (a-b, ii) radially averaged  
 224 intensity,  $I(\phi)$ .

225

226

227



228 Summary of *in situ* WAXS and SAXS data for  $T_{\text{mold}} = 90^{\circ}\text{C}$  during the heating and annealing steps

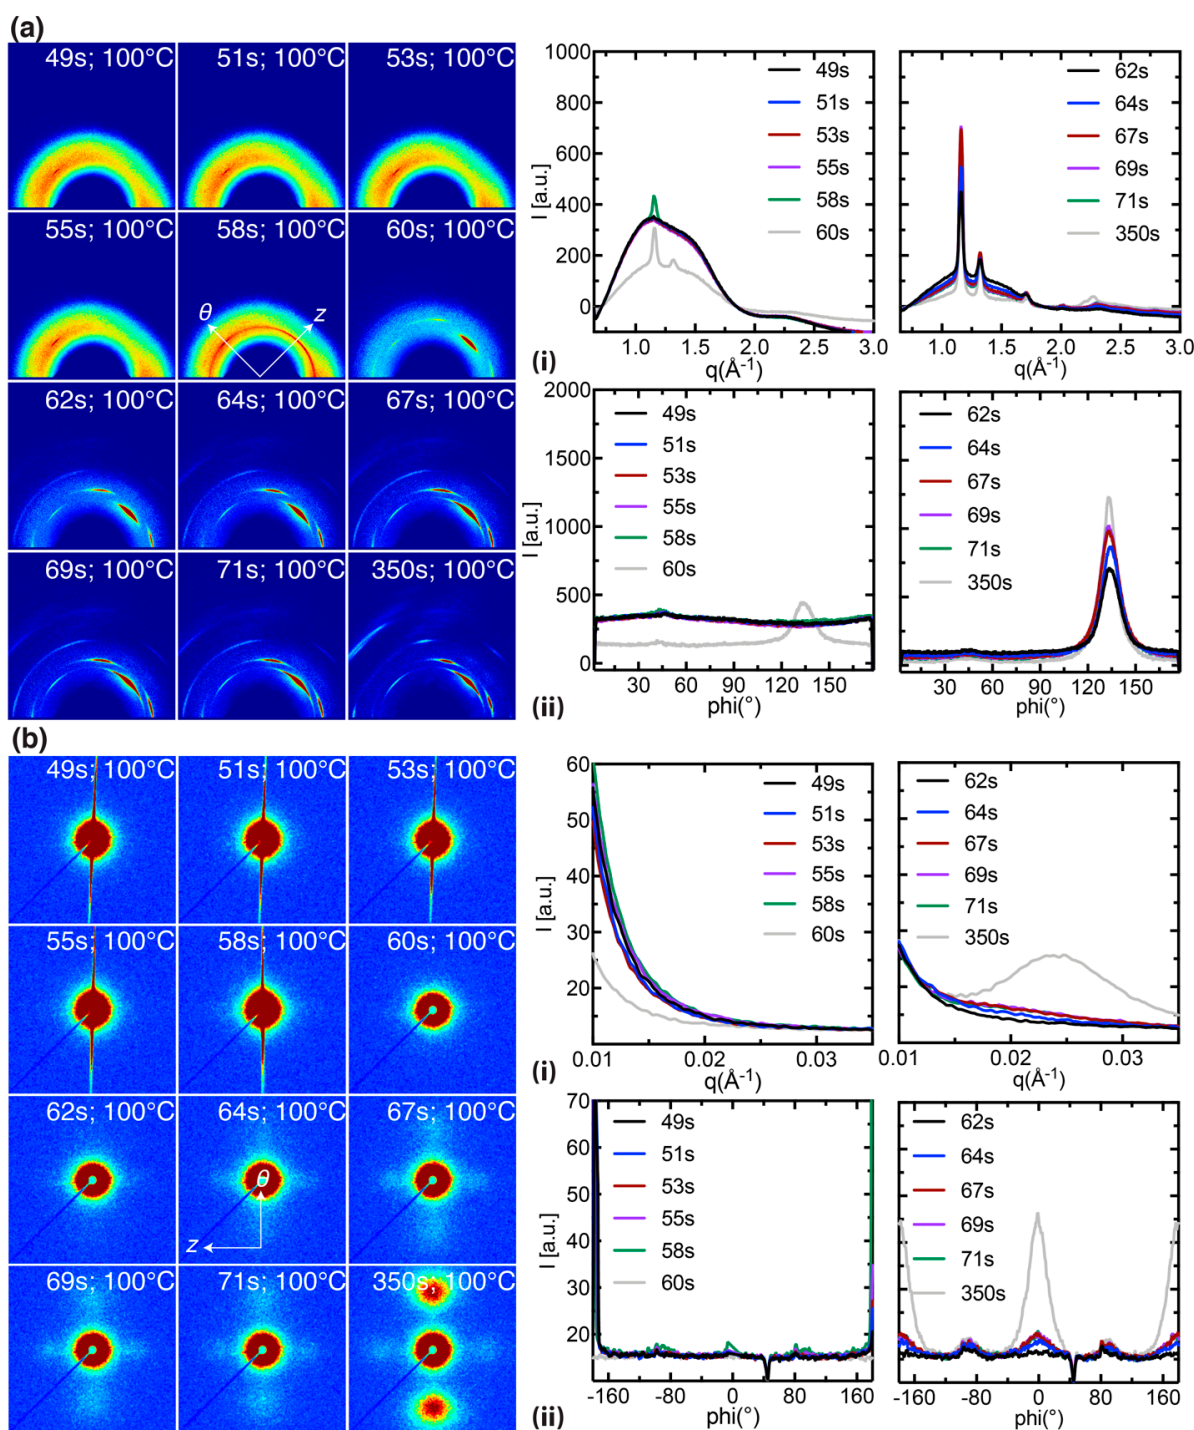

229

230 **Figure S12:** *In situ* (a) WAXS and (b) SAXS data acquired on a PLLA preform stretched at  $T_{\text{mold}} = 90^{\circ}\text{C}$ . The  
 231 corresponding temperature and strain profiles are presented in Figs. 3-4a. The WAXS and SAXS data are  
 232 presented as (a-b, left) 2D patterns, (a-b, i) azimuthally averaged intensity,  $I(q)$ , and (a-b, ii) radially averaged  
 233 intensity,  $I(\phi)$ .

234

235

236

237 Summary of *in situ* WAXS and SAXS data for  $T_{\text{mold}}^x = 80^\circ\text{C}$  during the heating and annealing steps

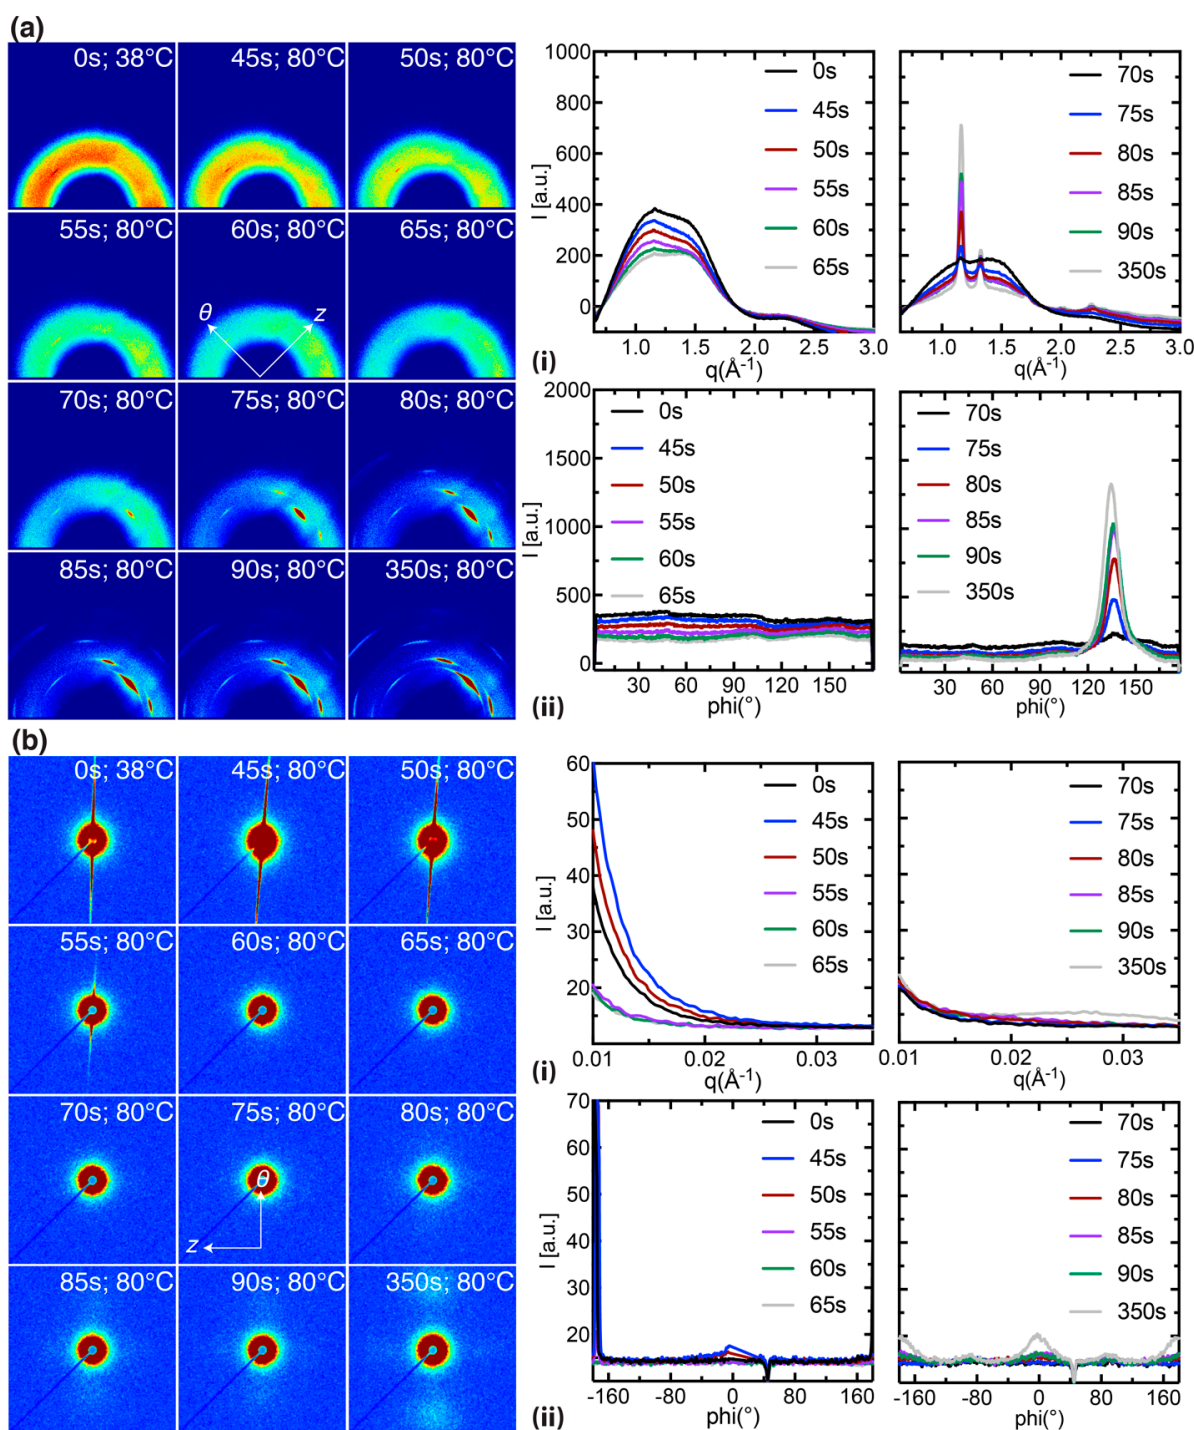

238

239 **Figure S13:** *In situ* (a) WAXS and (b) SAXS data acquired on a PLLA preform stretched at  $T_{\text{mold}}^x = 80^\circ\text{C}$ . The  
 240 corresponding temperature and strain profiles are presented in Figs. 3-4b. The WAXS and SAXS data are  
 241 presented as (a-b, left) 2D patterns, (a-b, i) azimuthally averaged intensity,  $I(q)$ , and (a-b, ii) radially averaged  
 242 intensity,  $I(\phi)$ .

243

244

245

246 Summary of *in situ* WAXS and SAXS data for  $T_{\text{mold}}^x = 90^\circ\text{C}$  during the heating and annealing steps

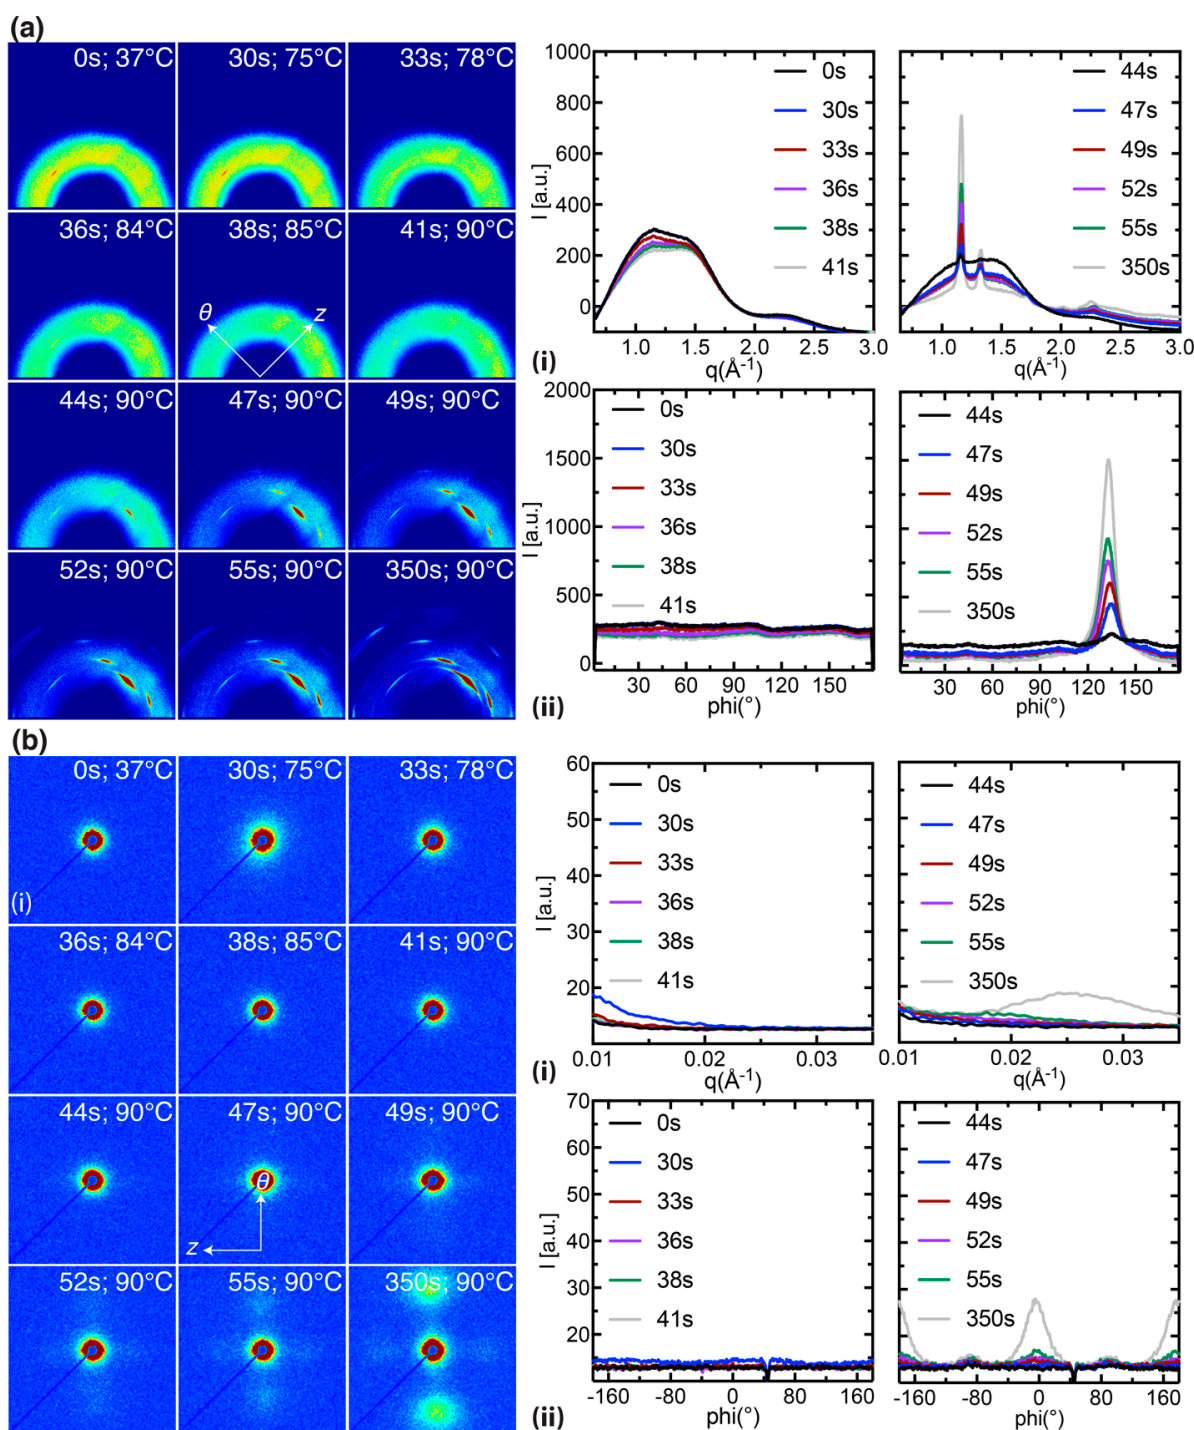

247

248 **Figure S14:** *In situ* (a) WAXS and (b) SAXS data acquired on a PLLA preform stretched at  $T_{\text{mold}}^x = 90^\circ\text{C}$ . The  
 249 corresponding temperature and strain profiles are presented in Figs. 3-4b. The WAXS and SAXS data are  
 250 presented as (a-b, left) 2D patterns, (a-b, i) azimuthally averaged intensity,  $I(q)$ , and (a-b, ii) radially averaged  
 251 intensity,  $I(\phi)$ .

252

## 253 X-ray scattering data during the cooling phase

254 The intensity of the SAXS peaks increases during the first half of annealing (<200s Figs S15-20b)  
255 but decreases rapidly during cooling (>350s, Figs. S15-20b). On the other hand, the interlamellar  
256 spacing monotonically decreases with time post expansion during both the annealing and the cooling  
257 steps (Fig. S22a-b, right). We hypothesize that a combination of oriented crystallization and changes  
258 in density driven by temperature explain the observed trend in the SAXS data. The inflation of the  
259 tube imposes strains in excess of 400% at the inner diameter, which is likely to induce “shish-kebabs”  
260 along the  $\theta$ -direction of the tube (meridional peaks in the SAXS patterns, Figs. S15-20b). This  
261 morphology is characterized by regularly spaced lamellar stacks called “kebabs” that decorate a  
262 central stem of oriented polymer chains called “shish”. The SAXS intensity increases during the first  
263 200s due to a decrease in the density of the interlamellar space and to the growth of kebabs; the  
264 gradual thickening of kebabs during annealing may explain the steady decrease in the long period.  
265 During the cooling step, the SAXS intensity decreases due to the densification of amorphous  
266 interlamellar space (see Fig. S15-20b); the possible growth of fringed micelles in the interlamellar  
267 space during cooling may also contribute towards a decrease in SAXS intensity. In the final SAXS  
268 frame, there is little to evidence of regularly alternating lamellar superstructures in the expanded  
269 tube (700s, Figs. S15-20b). Therefore, the transient structure reveals aspects of the PLLA  
270 semicrystalline morphology that are concealed in the final state of the expanded tube. The instrument  
271 also helps to identify expansion conditions that may favor the growth of shish-kebabs (e.g. the  
272 transient SAXS intensity is much stronger in  $T^{\times}_{\text{mold}} = 100^{\circ}\text{C}$  compared to  $T^{\times}_{\text{mold}} = 80^{\circ}\text{C}$ , compare Fig.  
273 S18 with Fig. S20), which may be advantageous for the BVS as they are known to boost strength in  
274 polymers by an order of magnitude.

275



276 Summary of *in situ* WAXS and SAXS data for  $T^{\text{e}}_{\text{mold}} = 80^{\circ}\text{C}$  including the cooling phase

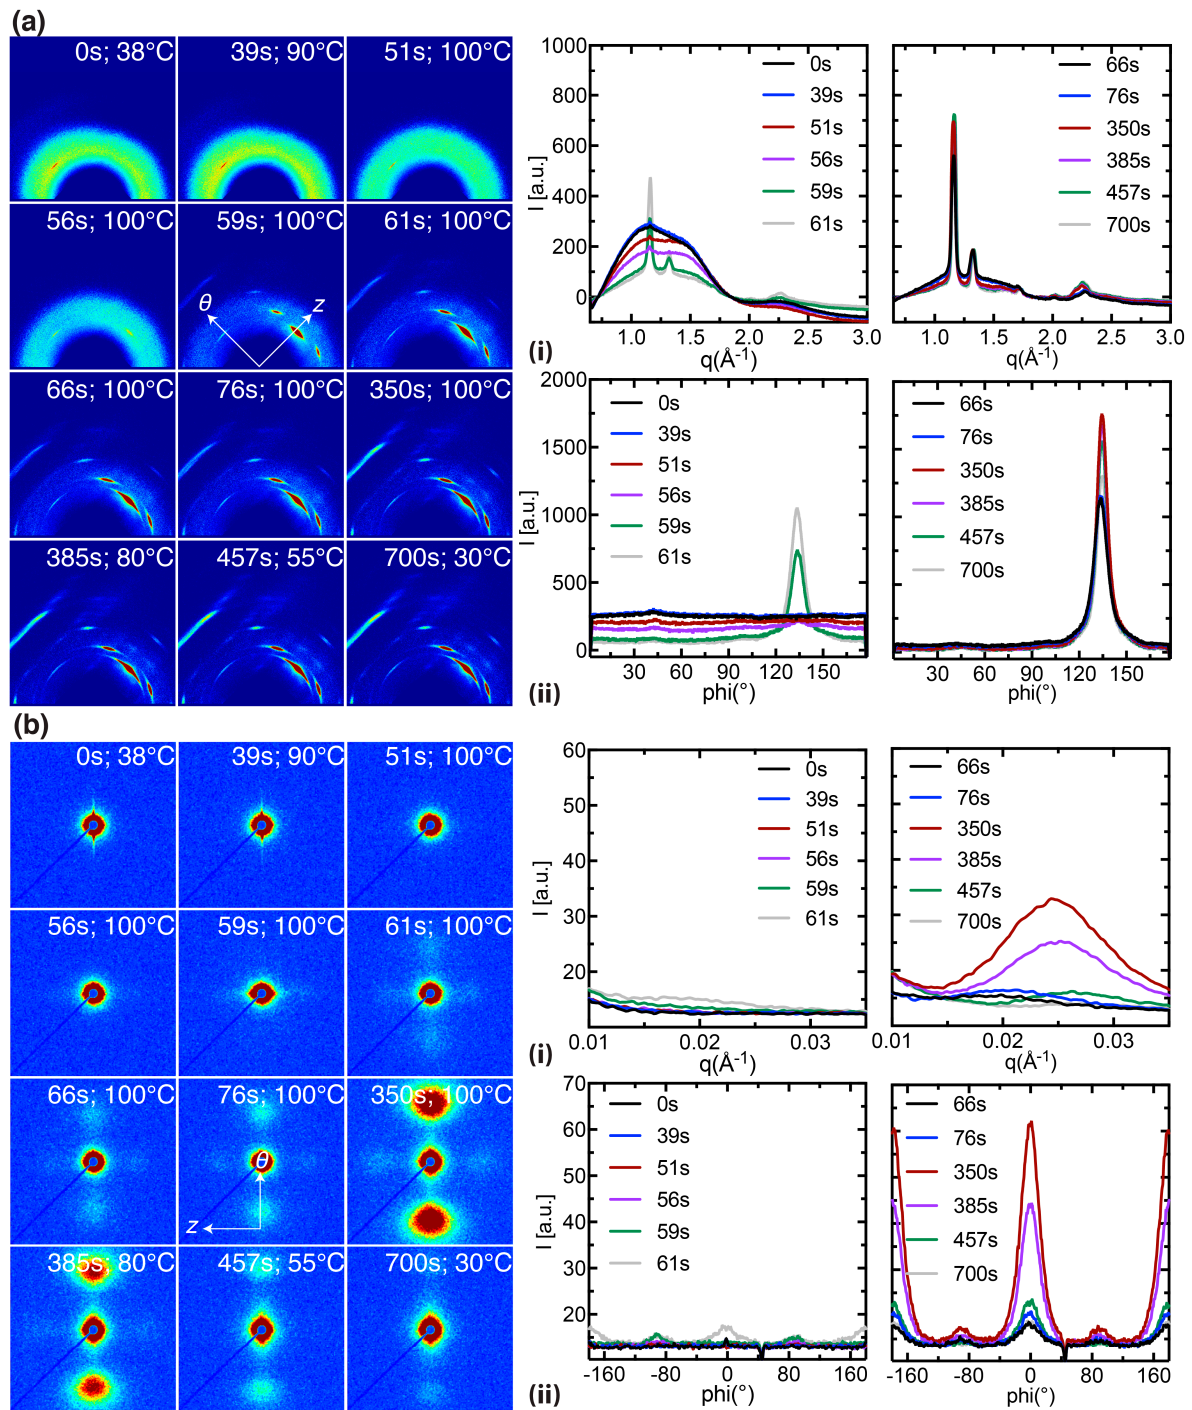

277

278 **Figure S15:** *In situ* (a) WAXS and (b) SAXS data acquired on a PLLA preform stretched at  $T^{\text{e}}_{\text{mold}} = 80^{\circ}\text{C}$ ; the first  
 279 9 patterns capture the transient expansion and annealing steps ( $t < 350\text{s}$ ,  $T^{\text{a}}_{\text{mold}} = 100^{\circ}\text{C}$ ) while the last 3 patterns  
 280 capture the structure of the expanded tube during cooling ( $t > 350\text{s}$ ). The WAXS and SAXS data are presented as  
 281 2D diffraction patterns, (a-b, i) azimuthally averaged intensity,  $I(q)$ , and (a-b, ii) radially averaged intensity,  $I(\phi)$ .

282



283 Summary of *in situ* WAXS and SAXS data for  $T^{\text{e}}_{\text{mold}} = 90^{\circ}\text{C}$  including the cooling phase

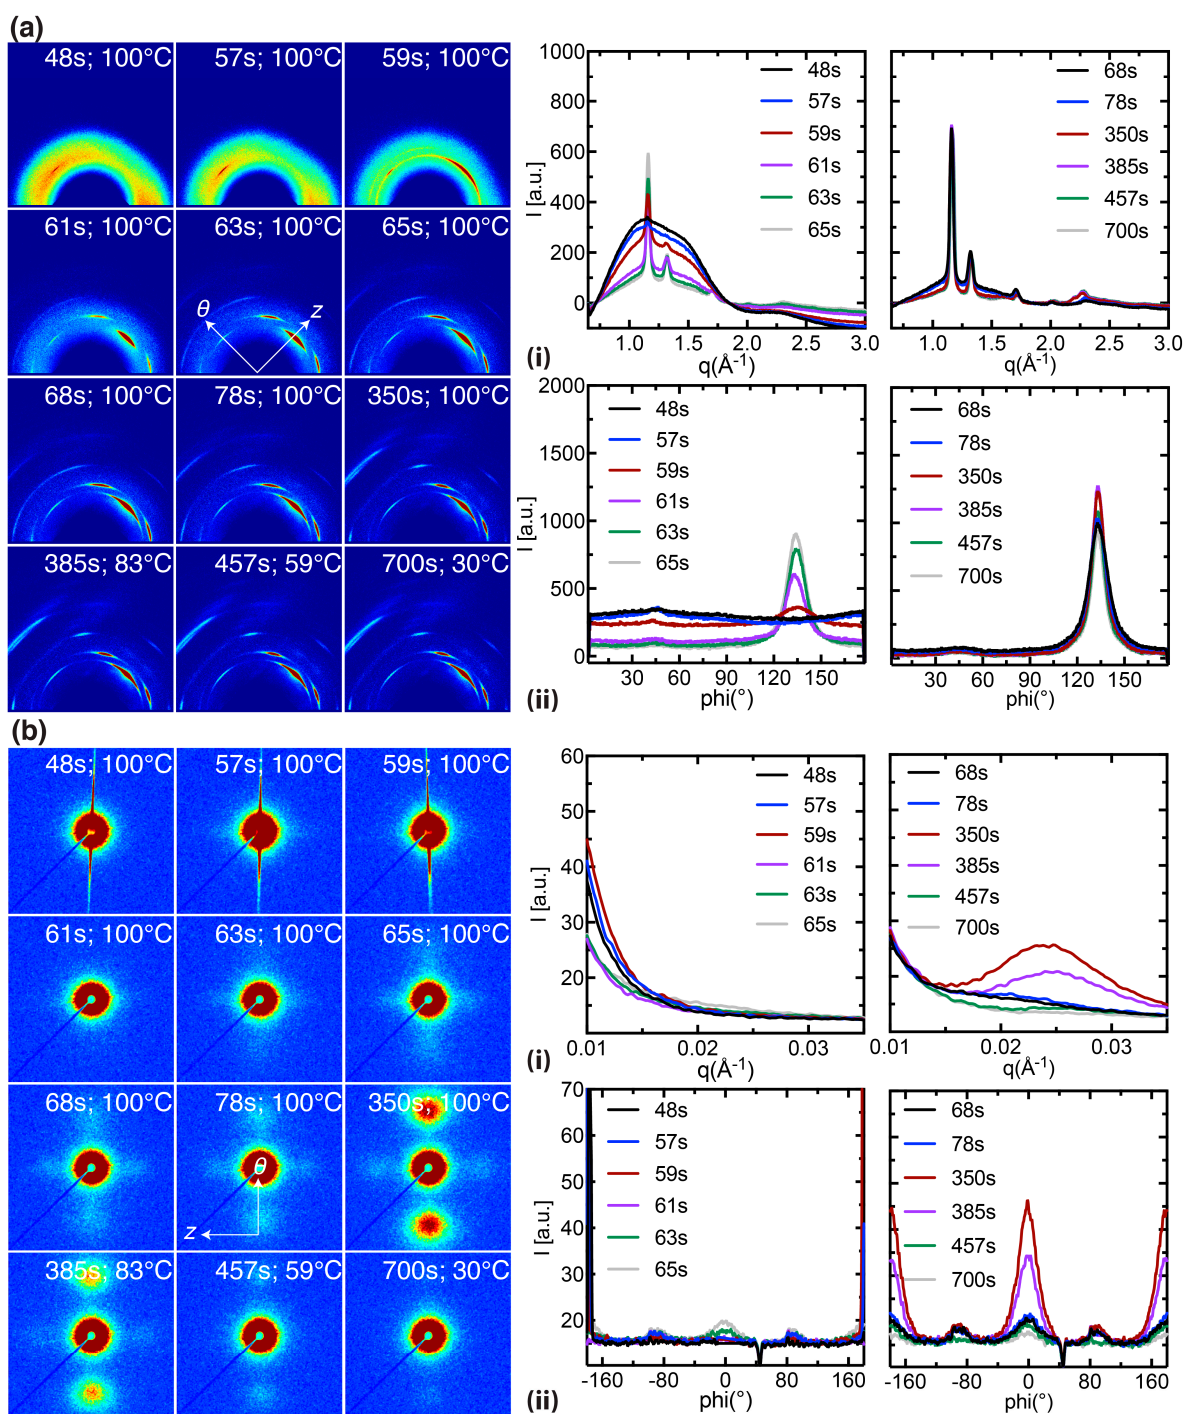

284

285 **Figure S16:** *In situ* (a) WAXS and (b) SAXS data acquired on a PLLA preform stretched at  $T^{\text{e}}_{\text{mold}} = 90^{\circ}\text{C}$ ; the first  
 286 9 patterns capture the transient expansion and annealing steps ( $t < 350\text{s}$ ,  $T^{\text{a}}_{\text{mold}} = 100^{\circ}\text{C}$ ) while the last 3 patterns  
 287 capture the structure of the expanded tube during cooling ( $t > 350\text{s}$ ). The WAXS and SAXS data are presented as  
 288 2D diffraction patterns, (a-b, i) azimuthally averaged intensity,  $I(q)$ , and (a-b, ii) radially averaged intensity,  $I(\varphi)$ .

289

290

291 Summary of *in situ* WAXS and SAXS data for  $T^{\text{e,mold}} = 100^{\circ}\text{C}$  including the cooling phase

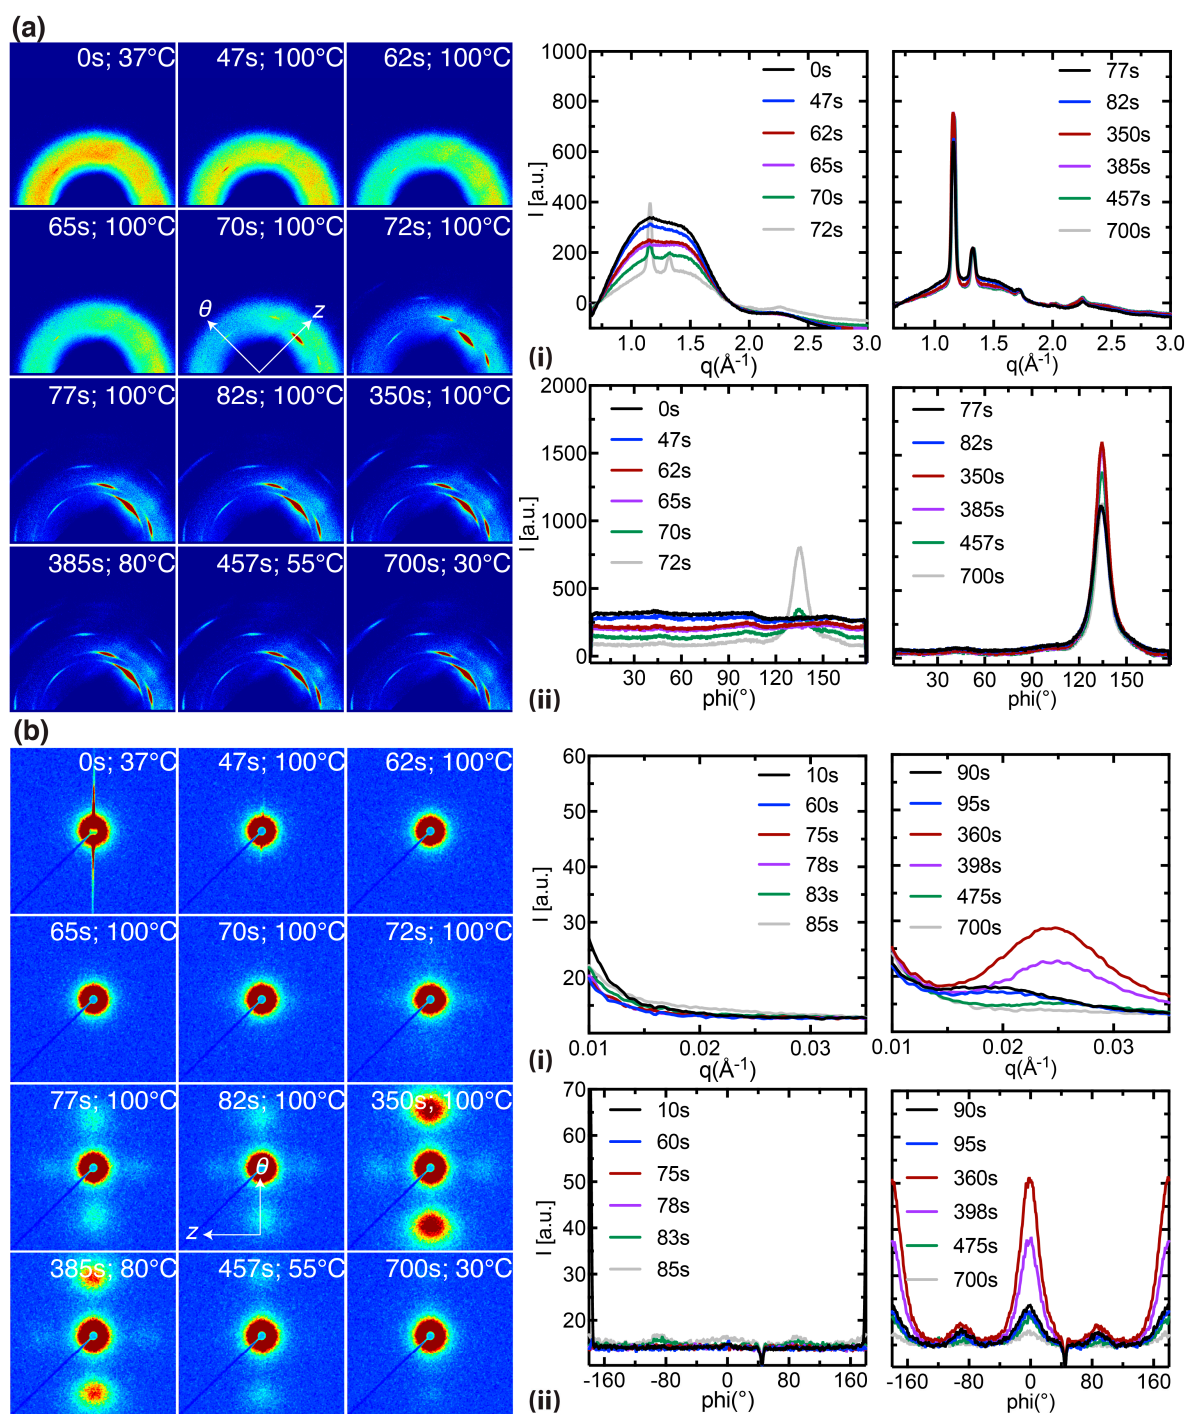

292

293 **Figure S17:** *In situ* (a) WAXS and (b) SAXS data acquired on a PLLA preform stretched at  $T^{\text{e,mold}} = 100^{\circ}\text{C}$ ; the first  
 294 9 patterns capture the transient expansion and annealing steps ( $t < 350\text{s}$ ,  $T^{\text{a,mold}} = 100^{\circ}\text{C}$ ) while the last 3 patterns  
 295 capture the structure of the expanded tube during cooling ( $t > 350\text{s}$ ). The WAXS and SAXS data are presented as  
 296 2D diffraction patterns, (a-b, i) azimuthally averaged intensity,  $I(q)$ , and (a-b, ii) radially averaged intensity,  $I(\phi)$ .

297

298

299 Summary of *in situ* WAXS and SAXS data for  $T^{\text{mold}} = 80^{\circ}\text{C}$  including the cooling phase

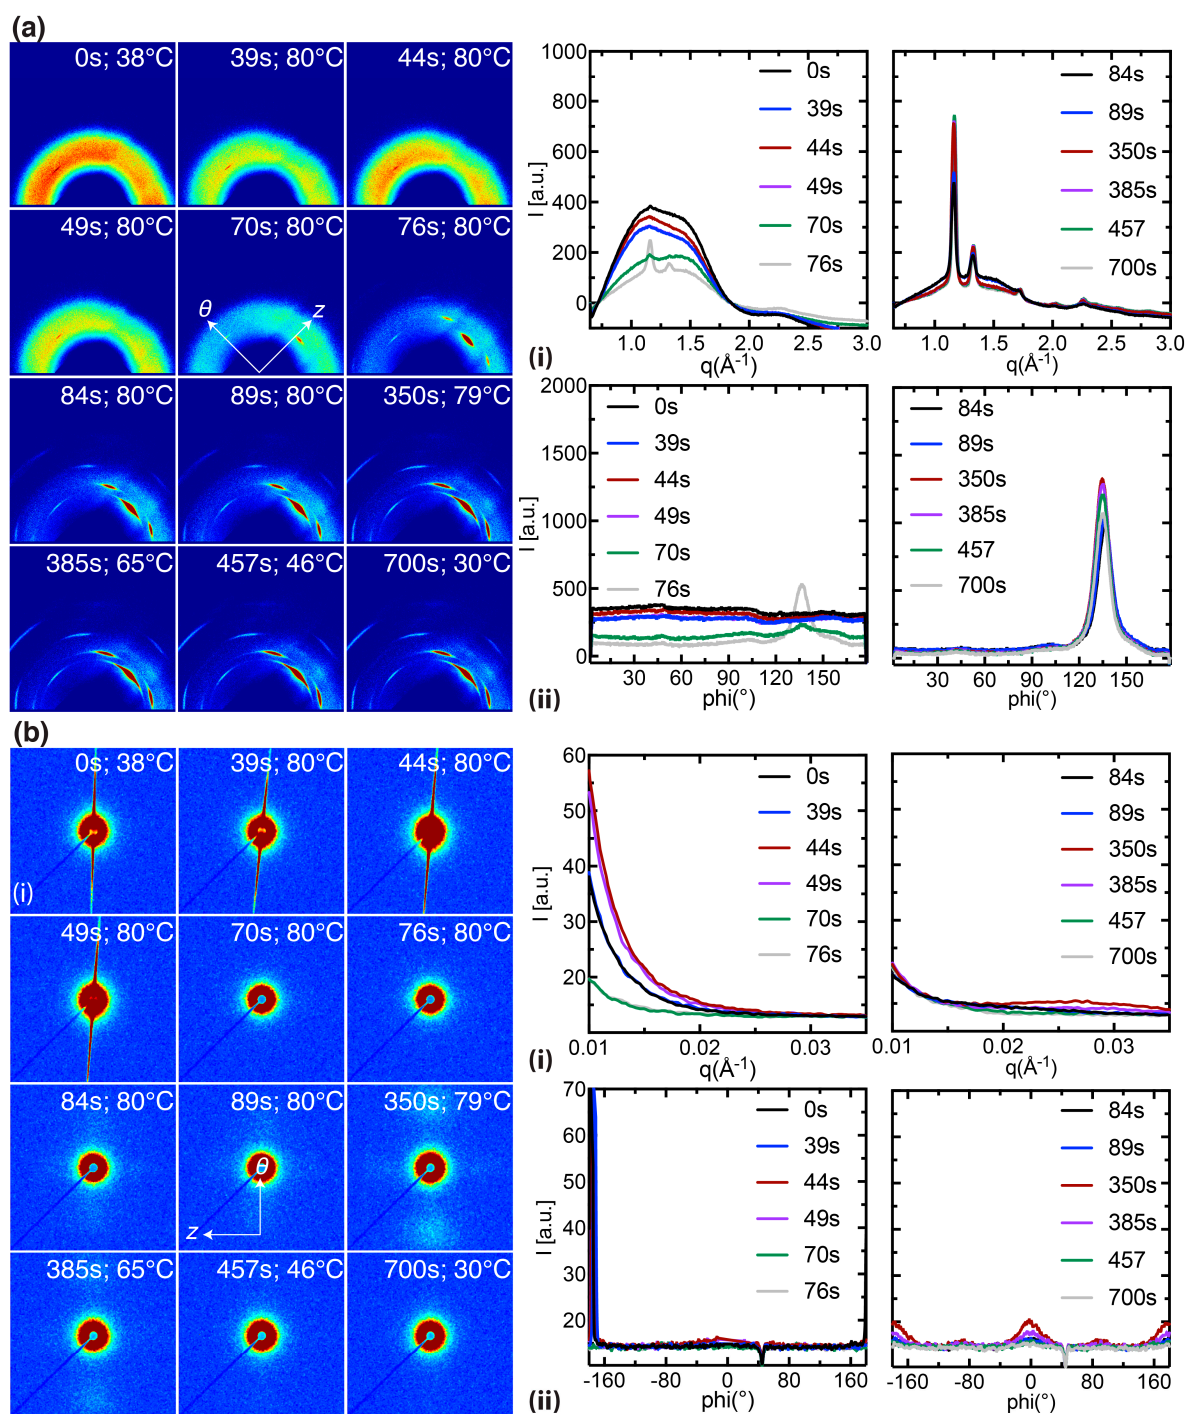

300

301 **Figure S18:** *In situ* (a) WAXS and (b) SAXS data acquired on a PLLA preform stretched at  $T^{\text{mold}} = 80^{\circ}\text{C}$ ; the first  
 302 9 patterns capture the transient expansion and annealing steps ( $t < 350\text{s}$ ,  $T^{\text{mold}} = 80^{\circ}\text{C}$ ) while the last 3 patterns  
 303 capture the structure of the expanded tube during cooling ( $t > 350\text{s}$ ). The WAXS and SAXS data are presented as  
 304 2D diffraction patterns, (a-b, i) azimuthally averaged intensity,  $I(q)$ , and (a-b, ii) radially averaged intensity,  $I(\phi)$ .

305



306 Summary of *in situ* WAXS and SAXS data for  $T^{\times}_{\text{mold}} = 90^{\circ}\text{C}$  including the cooling phase

307

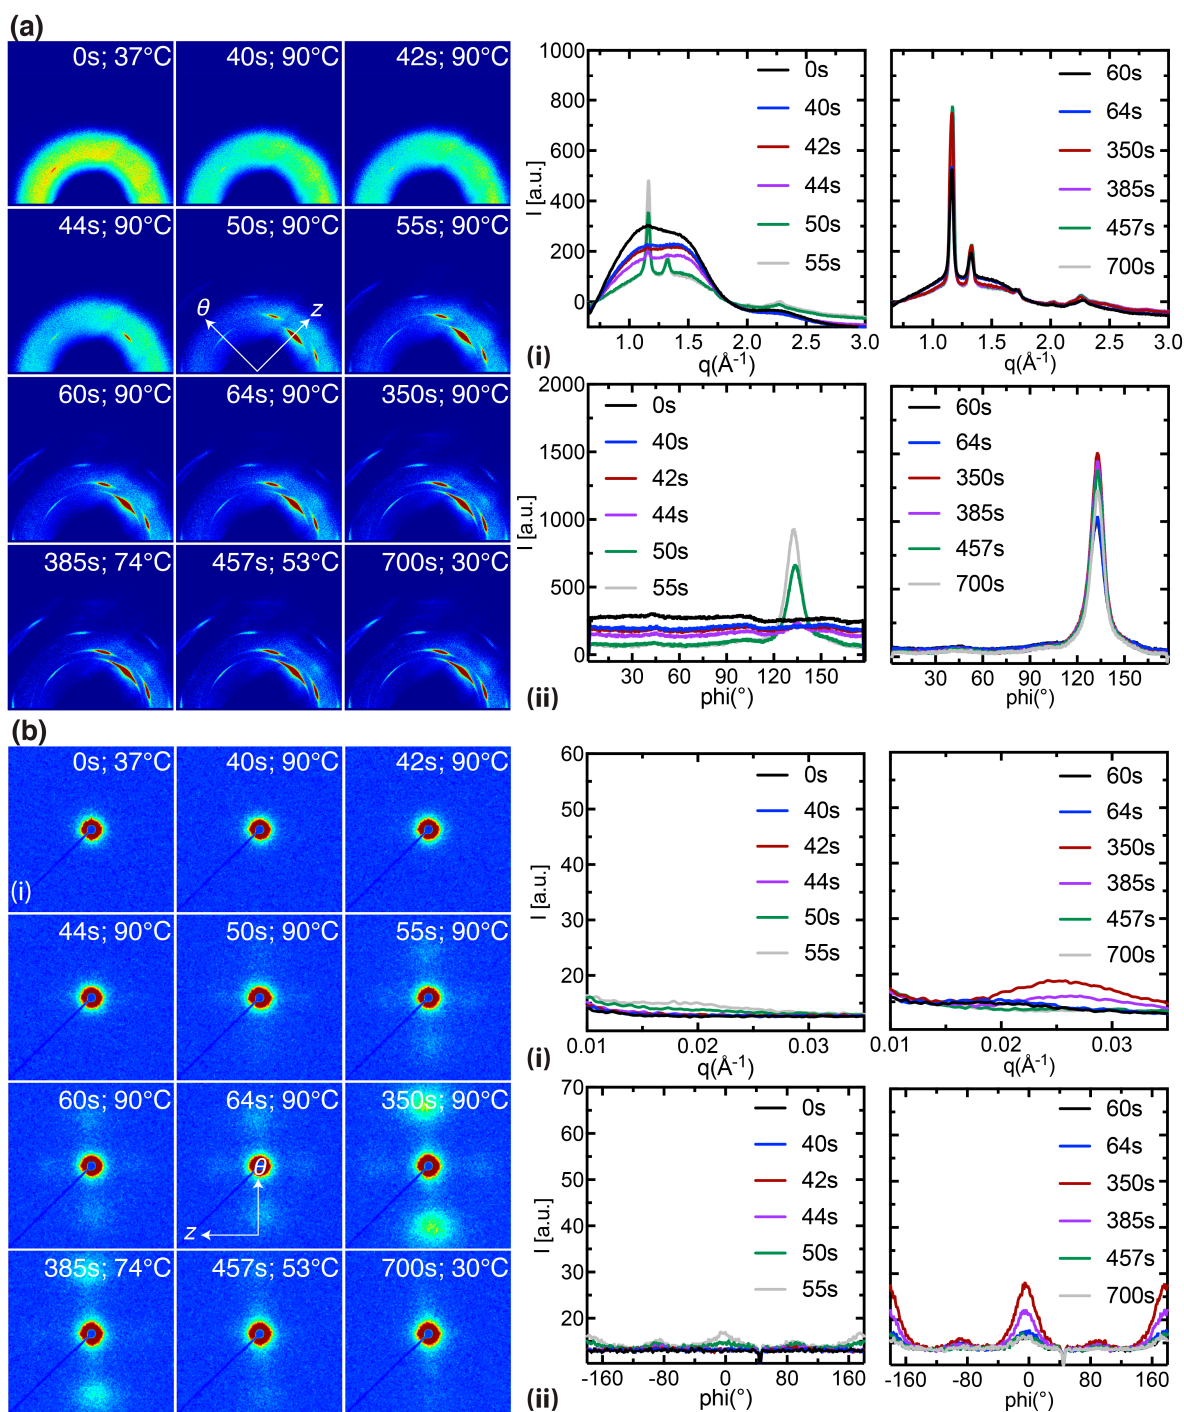

308

309 **Figure S19:** *In situ* (a) WAXS and (b) SAXS data acquired on a PLLA preform stretched at  $T^{\times}_{\text{mold}} = 90^{\circ}\text{C}$ ; the first  
 310 9 patterns capture the transient expansion and annealing steps ( $t < 350\text{s}$ ,  $T^{\text{a}}_{\text{mold}} = 90^{\circ}\text{C}$ ) while the last 3 patterns  
 311 capture the structure of the expanded tube during cooling ( $t > 350\text{s}$ ) The WAXS and SAXS data are presented as  
 312 2D diffraction patterns, (a-b, i) azimuthally averaged intensity,  $I(q)$ , and (a-b, ii) radially averaged intensity,  $I(\phi)$ .

313

314 Summary of *in situ* WAXS and SAXS data for  $T^{\text{mold}} = 100^{\circ}\text{C}$  including the cooling phase

315

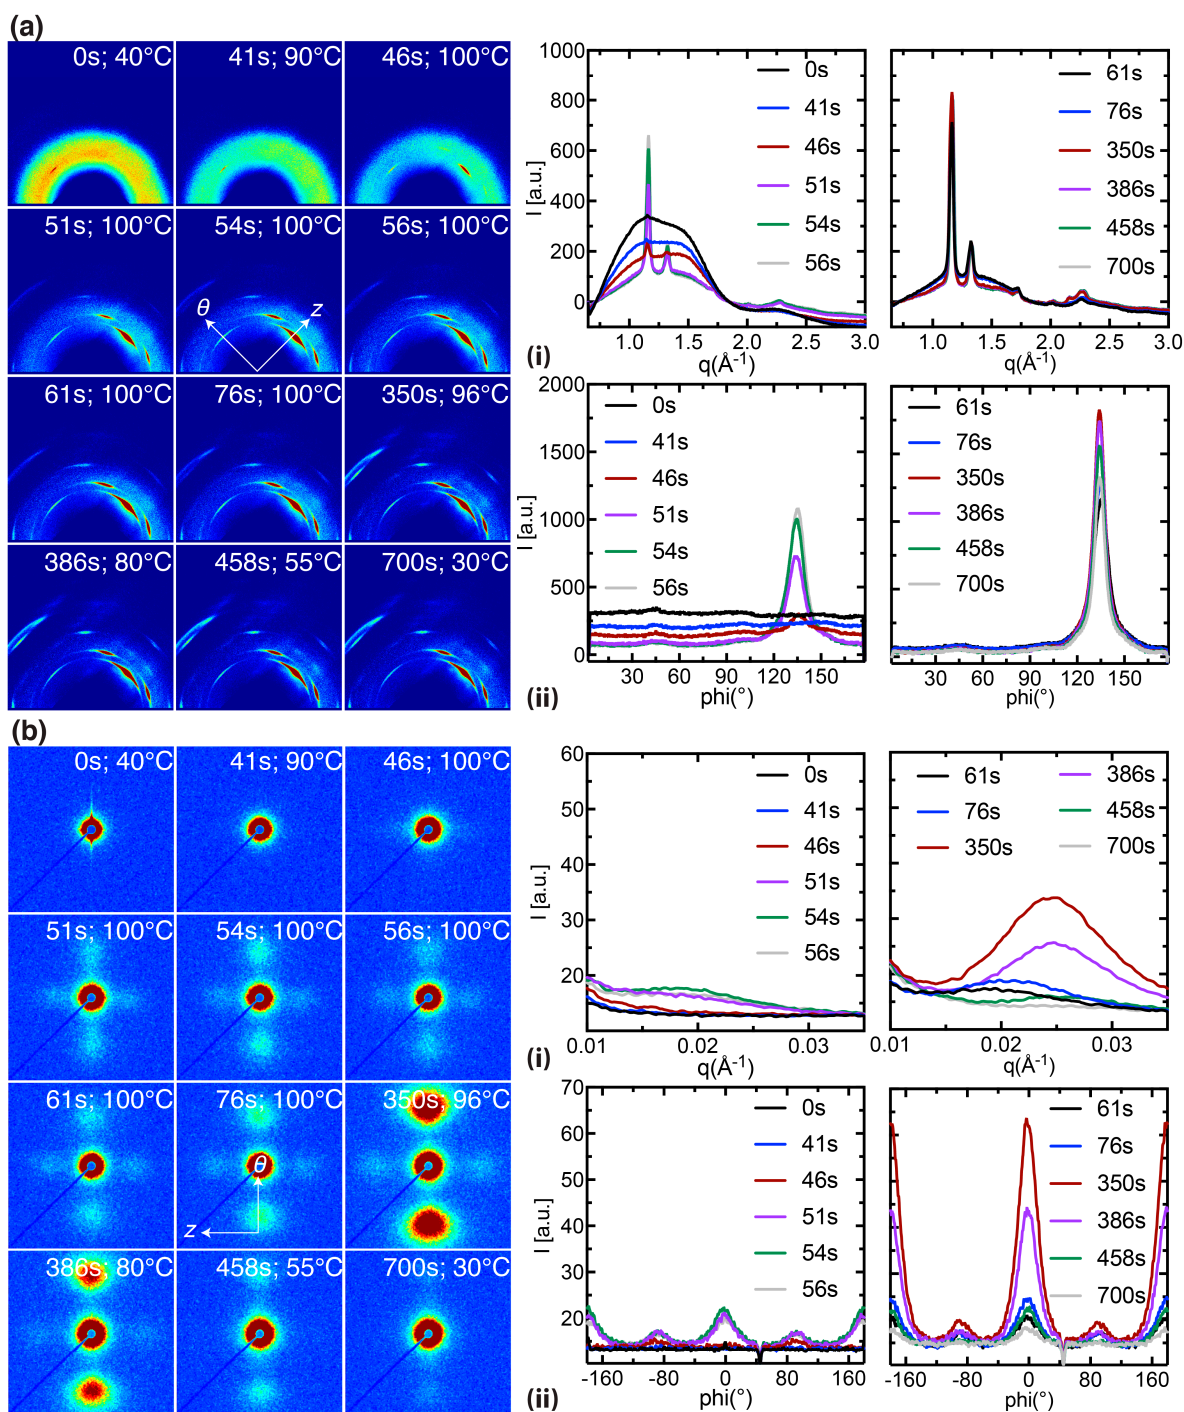

316

317 **Figure S20:** *In situ* (a) WAXS and (b) SAXS data acquired on a PLLA preform stretched at  $T^{\text{mold}} = 100^{\circ}\text{C}$ ; the first  
 318 9 patterns capture the transient expansion and annealing steps ( $t < 350\text{s}$ ,  $T^{\text{mold}} = 100^{\circ}\text{C}$ ) while the last 3 patterns  
 319 capture the structure of the expanded tube during cooling ( $t > 350\text{s}$ ) The WAXS and SAXS data are presented as  
 320 2D diffraction patterns, (a-b, i) azimuthally averaged intensity,  $I(q)$ , and (a-b, ii) radially averaged intensity,  $I(\varphi)$ .

321

322

323



324 **Quantitative WAXS analysis for patterns acquired during the heating, annealing and cooling steps**

325 The  $q$ -position of the (110)/(200) peaks is shifted towards lower values during annealing in  
 326 accord with thermal expansion of the crystal lattice ( $t < 350$ s, Fig. S21c); at the end of the cooling step,  
 327 it appears that the crystallites predominantly belong to the rigid and ordered  $\alpha$  morph ( $q \sim 1.17 \text{ \AA}^{-1}$ ,  
 328 Fig. S21) [5–7].

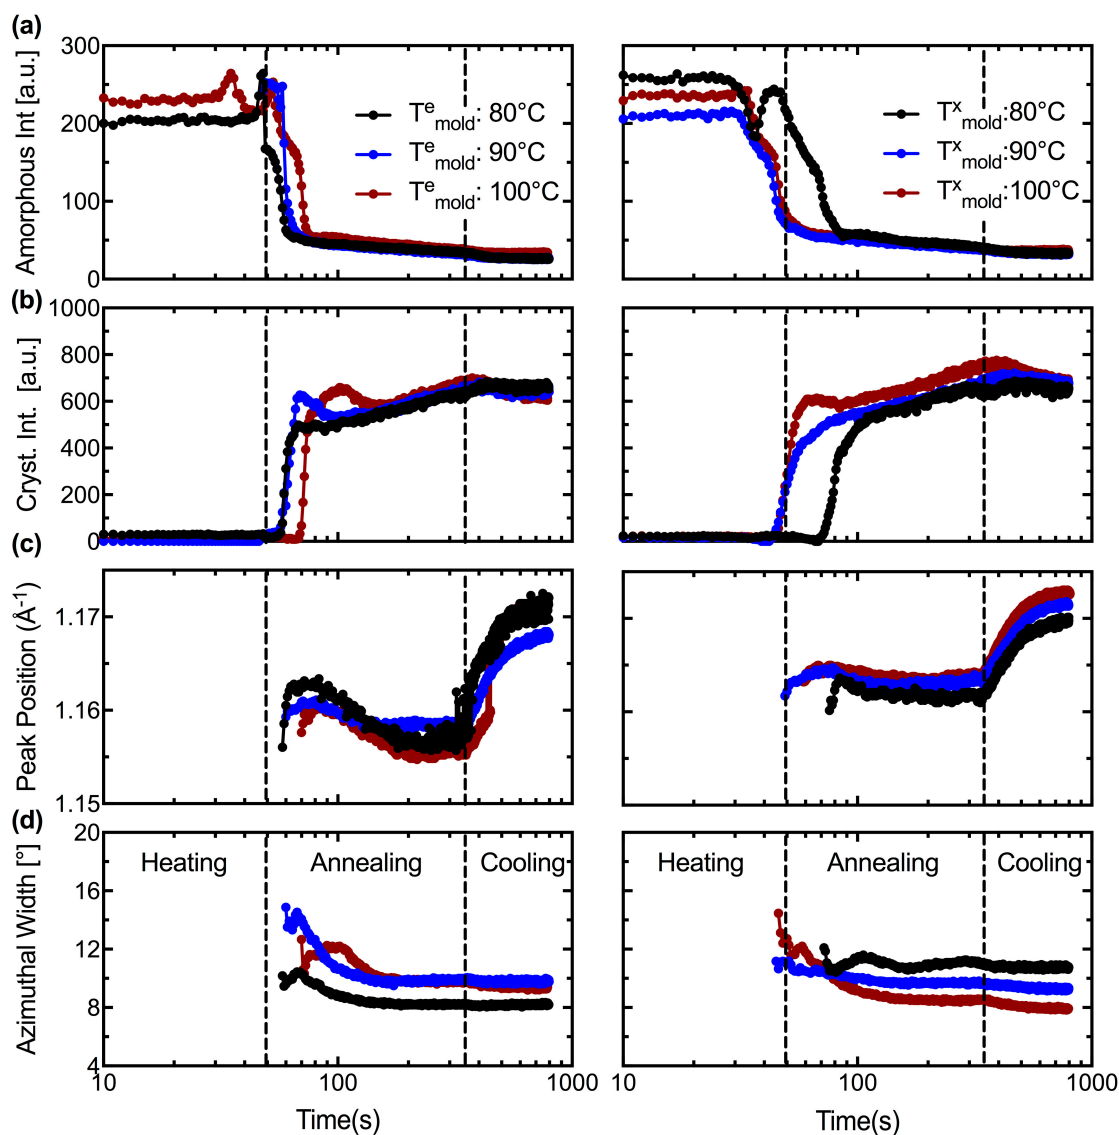

329 **Figure S21:** Quantitative characteristics of 1D WAXS profiles for expansion performed at (left)  $T_{\text{mold}}^e = 80, 90$  and  
 330  $100^\circ\text{C}$  and (right)  $T_{\text{mold}}^x = 80, 90$  and  $100^\circ\text{C}$ . The variation in (a) amorphous content, (b) crystallinity, (c)  
 331 peak position of the (110)/(200) peaks and (d) full width at half maximum of the (110)/(200) peaks is presented. The  
 332 vertical dashed lines indicate the onset of the annealing and cooling steps. The corresponding temperature  
 333 profiles are presented in Figure 3 of the main text.

334

335

336

337

338

## 339 Quantitative SAXS analysis for data acquired during the heating, annealing and cooling steps

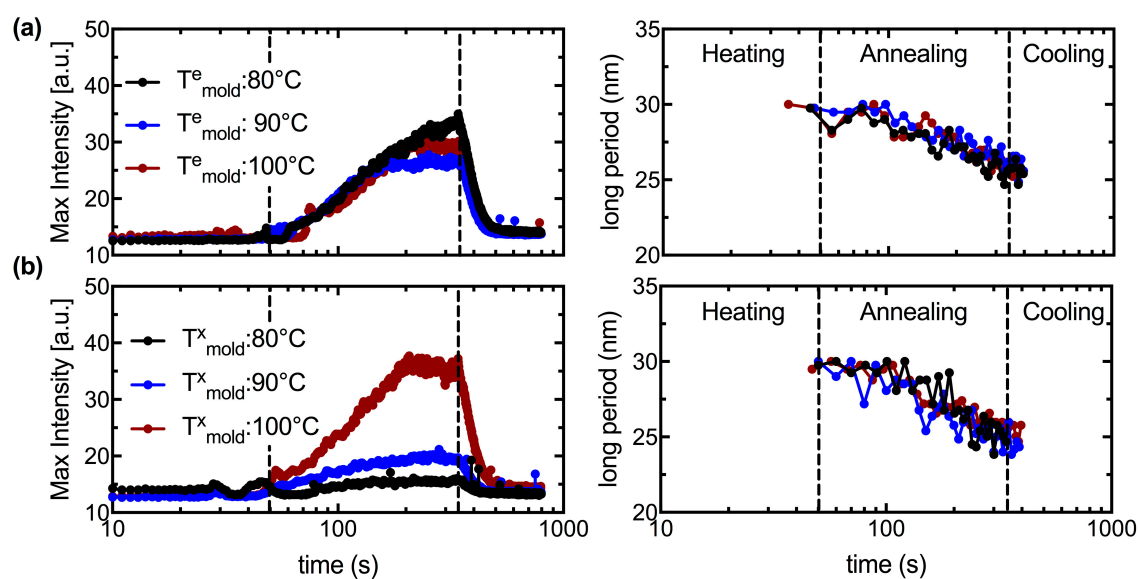

340

341 **Figure S22:** Quantitative characteristics of 1D SAXS profiles for expansion performed at (a)  $T_{\text{mold}}^e = 80, 90$  and  
 342  $100^\circ\text{C}$  and (b)  $T_{\text{mold}}^x = 80, 90$  and  $100^\circ\text{C}$ . The variation in (a-b, left) maximum intensity of the meridional SAXS  
 343 peaks and (a-b, right) the interlamellar spacing is presented. The vertical dashed lines indicate the onset of the  
 344 annealing and cooling steps. The corresponding temperature profiles are presented in Figure 3 of the main text.

345

346 **References:**

- 347 1. Mulbry, W.; Reeves, J. B.; Millner, P. Use of mid- and near-infrared spectroscopy to track degradation  
348 of bio-based eating utensils during composting. *Bioresour. Technol.* **2012**, *109*, 93–97,  
349 doi:10.1016/j.biortech.2012.01.029.
- 350 2. Schnelle, W.; Engelhardt, J.; Gmelin, E. Specific heat capacity of Apiezon N high vacuum grease and of  
351 Duran borosilicate glass. *Cryogenics* **1999**, *39*, 271–275, doi:10.1016/S0011-2275(99)00035-1.
- 352 3. Aou, K.; Kang, S.; Hsu, S. L. Morphological Study on Thermal Shrinkage and Dimensional Stability  
353 Associated with Oriented Poly ( lactic acid ). *Macromolecules* **2005**, *38*, 7730–7735.
- 354 4. Kim, H. S.; Chae, Y. S.; Park, B. H.; Yoon, J. S.; Kang, M.; Jin, H. J. Thermal and electrical conductivity  
355 of poly(l-lactide)/multiwalled carbon nanotube nanocomposites. *Curr. Appl. Phys.* **2008**, *8*, 803–806,  
356 doi:10.1016/j.cap.2007.04.032.
- 357 5. Di Lorenzo, M. L.; Cocca, M.; Malinconico, M. Crystal polymorphism of poly(l-lactic acid) and its  
358 influence on thermal properties. *Thermochim. Acta* **2011**, *522*, 110–117, doi:10.1016/j.tca.2010.12.027.
- 359 6. Wasanasuk, K.; Tashiro, K.; Hanesaka, M.; Ohhara, T.; Kurihara, K.; Kuroki, R.; Tamada, T.; Ozeki, T.;  
360 Kanamoto, T. Crystal structure analysis of poly(l-lactic acid)  $\alpha$  form on the basis of the 2-dimensional  
361 wide-angle synchrotron X-ray and neutron diffraction measurements. *Macromolecules* **2011**, *44*, 6441–  
362 6452, doi:10.1021/ma2006624.
- 363 7. Billimoria, K.; Heeley, E. L.; Parsons, N.; Figiel, Ł. An investigation into the crystalline morphology  
364 transitions in poly-L- lactic acid (PLLA) under uniaxial deformation in the quasi-solid-state regime.  
365 *Eur. Polym. J.* **2018**, *101*, 127–139, doi:S0014305717322292.

366

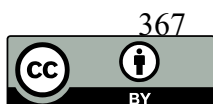

Supplement: s1 [file s1]
